1 **Coordinated crosstalk between microtubules and actin by a spectraplakin**  
2 **regulates lumen formation and branching**

3

4 Delia Ricolo<sup>1,2</sup> and Sofia J. Araújo<sup>1,2\*</sup>

5 <sup>1</sup>Department of Genetics, Microbiology and Statistics, School of Biology, University of  
6 Barcelona, 08028 Barcelona, Spain

7 <sup>2</sup>Institute of Biomedicine University of Barcelona (IBUB), Barcelona, Spain

8 \*Corresponding author. email: S. J. Araújo [sofiajaraujo@ub.edu](mailto:sofiajaraujo@ub.edu),

9

10 Keywords: lumen; subcellular; branching; *Drosophila*; trachea; short-stop; shot; tau

11

12 Running title: Shot and tau in subcellular branching

13

14 **SUMMARY**

15 The establishment of branched structures by single cells involves complex cytoskeletal  
16 remodelling events. In *Drosophila*, epithelial tracheal system terminal cells (TCs) and  
17 dendritic arborisation neurons are models for these subcellular branching processes.  
18 During tracheal embryonic development, the generation of subcellular branches is  
19 characterized by extensive remodelling of the microtubule (MT) network and actin  
20 cytoskeleton, followed by vesicular transport and membrane dynamics. We have  
21 previously shown that centrosomes are key players in the initiation of subcellular lumen  
22 formation where they act as microtubule organizing centres (MTOCs). However, not  
23 much is known on the events that lead to the growth of these subcellular luminal  
24 branches or what makes them progress through a particular trajectory within the  
25 cytoplasm of the TC. Here, we have identified that the spectraplakin *Short-stop* (*Shot*)  
26 promotes the crosstalk between MTs and actin, which leads to the extension and  
27 guidance of the subcellular lumen within the TC cytoplasm. Shot is enriched in cells  
28 undergoing the initial steps of subcellular branching as a direct response to FGF

1 signalling. An excess of Shot induces ectopic acentrosomal branching points in the  
2 embryonic and larval tracheal TC leading to cells with extra subcellular lumina. These  
3 data provide the first evidence for a role for spectraplakins in subcellular lumen formation  
4 and branching.

5

## 6 **INTRODUCTION**

7 Cell shape is intrinsically connected with cell function and varies tremendously  
8 throughout nature. Tissue and organ morphogenesis rely on cellular branching  
9 mechanisms that can be multicellular or arise within a single-cell. Through extensive  
10 cellular remodelling, this so-called single-cell or subcellular branching, transforms an  
11 initially relatively symmetrical unbranched cell into an elaborate branched structure.  
12 These cellular remodelling events are triggered by widespread cytoskeletal changes and  
13 cell membrane growth, which allow these branched cells to span very large areas and  
14 accomplish their final function. Despite this clear link between morphology and function,  
15 not much is known about the signalling events that trigger the formation of these  
16 subcellular branches or what makes them choose a particular trajectory within the  
17 cytoplasm of the cell.

18 In *Drosophila melanogaster*, tracheal system terminal cells (TCs) and nervous system  
19 dendrites are models for these subcellular branching processes. During tracheal  
20 embryonic through larval development, the generation of single-cell branched structures  
21 by TCs is characterized by extensive remodelling of the MT network and actin  
22 cytoskeleton, followed by vesicular transport and membrane dynamics (1-3). During  
23 embryonic development, TCs, as tip-cells, lead multicellular branch migration and  
24 extension in response to Bnl-Btl signalling, which induces the expression of *Drosophila*  
25 Serum Response Factor (DSRF/*blistered (bs)*) and its downstream effectors (4, 5).  
26 Although epithelial in origin, TCs do not have a canonical apical-basal polarity, and, as  
27 they migrate, extend numerous filopodia on their basolateral membrane, generating

1 transient protrusive branches at the leading edge (6). As a consequence, they display a  
2 polarity similar to that of a migrating mesenchymal cell (7).

3 While migrating and elongating, the TC invaginates a subcellular tube from its apical  
4 membrane, at the contact site with the stalk cell (1). The generation of this *de novo*  
5 subcellular lumen can be considered the beginning of the single-cell branching  
6 morphogenesis of this cell, which continues throughout larval stages to generate an  
7 elaborate single-cell branched structure with many subcellular lumina (3).

8 We have previously shown that centrosomes are key players in the initiation of  
9 subcellular branching events during embryogenesis. Here, they act as microtubule  
10 organizing centres (MTOCs) mediating the formation of single or multiple branched  
11 structures depending on their numbers in the TC (8). Centrosomes organise the growth  
12 of MT-bundles towards the elongating basolateral edge of the TC. These MTs have been  
13 suggested to serve both as trafficking mediators, guiding vesicles for delivery of  
14 membrane material, and as mechanical and structural stabilizers for the new subcellular  
15 lumen (3). Actin filaments are present at the growing tip, the basolateral and the luminal  
16 membrane of the TC, and actin-regulating factors such as DSRF, Enabled (Ena) and  
17 Moesin (Moe) have been shown to contribute to TC morphogenesis (1, 9, 10). During  
18 TC elongation, the lumen extends along with the cell, stabilizing the elongating cell body  
19 and maintaining a more or less constant distance between its own tip and the migrating  
20 tip of the cell (1). At the TC basolateral side, a dynamic actin pool integrates the filopodia  
21 and aligns the growing subcellular tube with the elongation axis (11-13). Together, MT-  
22 bundles and the basolateral actin pool are necessary for subcellular lumen formation (1).  
23 However, not much is known on how these two cytoskeletal structures are coordinated  
24 within the TC.

25 By the time the larva hatches, TCs have elongated and grown a full-length lumen, which  
26 becomes gas-filled along with the rest of the tracheal system. In the larva, terminal cells  
27 ramify extensively and form many new cytoplasmatic extensions each with a membrane-  
28 bound lumen creating tiny subcellular tubes that supply the targets with oxygen (14-16).

1 At larval stages, sprouting and extension of new branches in response to local hypoxia  
2 is generally considered to occur by essentially the same molecular mechanisms as the  
3 initial tube invagination and cell extension in the embryo (2, 17). However, not much is  
4 known about how hypoxic signalling is transduced into cytoskeletal modulation to  
5 achieve the single-cell branching morphogenesis of the TC. Also, what coordinates the  
6 crosstalk between microtubules and actin at the basolateral growing tip, how cell  
7 elongation is stabilized by lumen formation and how both processes remain coordinated  
8 is still poorly understood in both embryonic and larval TCs.

9 Spectraplakins are giant conserved cytoskeletal proteins with a complex multidomain  
10 architecture capable of binding MTs and actin. They have been reported to crosslink MT  
11 minus-ends to actin-networks, making MT-bundles more stable and resistant to  
12 catastrophe (18). Loss of spectraplakins has been shown *in vivo* to have remarkable  
13 effects on microtubule organization, cell polarity, cell morphology, and cell adhesion (19,  
14 20). *Drosophila* has a single spectraplakins, encoded by *short-stop* (*shot*) (20-22). *shot*  
15 mutants display pleiotropic phenotypes in wing adhesion, axon and dendrite outgrowth,  
16 tracheal fusion, muscle-tendon junction, dorsal (23)closure, oocyte specification and  
17 patterning, photoreceptor polarity and perinuclear microtubule network formation (21, 24-  
18 29). Shot has been shown to bind both the microtubule plus-end-binding EB1 and the  
19 microtubule minus-end-binding protein Patronin, required for the establishment of  
20 acentrosomal microtubule networks (26, 27, 30). It also has been shown to bind actin  
21 and to crosslink MTs and actin contributing to cytoskeletal organization (24).

22 In the present study, we uncover a novel role for the spectraplakins Shot in subcellular  
23 lumen formation and branching. Our results show that *shot* loss-of-function (LOF) leads  
24 to cells deficient in *de novo* subcellular lumen formation at embryonic stages. We show  
25 that Shot promotes the crosstalk between microtubules and actin, which leads to the  
26 extension and guidance of the subcellular lumen within the TC cytoplasm. We observe  
27 that Shot levels are enriched in cells undergoing the initial steps of subcellular branching

1 as a direct response to FGF signalling. And an excess of Shot induces ectopic  
2 acentrosomal branching points in the embryonic and larval tracheal TC leading to cells  
3 with extra subcellular lumina. Furthermore, we find that Tau protein can functionally  
4 replace Shot in subcellular lumen formation and branching.

5

## 6 **RESULTS**

### 7 **Loss of Shot causes defects in *de novo* subcellular lumen formation**

8 Shot is expressed during *Drosophila* development in several tissues such as the  
9 epidermis, the midgut primordia, the trachea and the nervous system (25, 31). We began  
10 by analysing the effect of *shot* LOF during TC subcellular lumen formation. To do so, we  
11 analysed dorsal (DB) and ganglionic branch (GB) TCs at late stages of embryogenesis  
12 (st. 16) (Fig. 1 A, B).

13 The *shot*<sup>3</sup> null mutant TC phenotype consisted in subcellular lumen elongation defects  
14 with a penetrance of 80% (Fig. 1 C, D and F-I and E). This phenotype resembled the  
15 previously reported for *blistered* (*bs*) mutants (9). *bs* encodes the transcription factor  
16 DSRF that regulates TC fate induction in response to Bnl-Btl signalling (9, 32). However,  
17 we observed that DSRF was properly accumulated in *shot*<sup>3</sup> TC nuclei (Fig. 1 D),  
18 discarding a possible effect of Shot in TC fate induction.

19 To analyse if the *shot* phenotype was cell autonomous, we expressed *shot* RNAi to  
20 knock-down Shot in all tracheal cells and found that, like in null mutant conditions, 80%  
21 of TCs analysed (n=300) at the tip of the dorsal branches (n=150) or ganglionic branches  
22 (n=150) were affected in subcellular lumen formation (Fig. 1 J, K). Of these, 20% did not  
23 develop a terminal lumen at all (Fig. 1 L).

24 *shot*<sup>3</sup> embryonic TC lumen phenotypes range in expressivity from complete absence of  
25 subcellular lumen to different lengths of shorter lumina (Fig. 1 M, N). When quantified,  
26 out of the 80% of embryos that showed a TC luminal phenotype, 36% of TCs did not  
27 elongate a subcellular lumen at all and 64% failed to accomplish a full-length lumen (300

1 ganglionic TCs and 300 dorsal TCs) (Fig. 1 M, N). Taken together, these results indicated  
2 that Shot is involved in *de novo* subcellular lumen formation and elongation.

3

#### 4 **Shot overexpression induces extra subcellular branching independently of the** 5 **centrosome**

6 Having observed that Shot was necessary for subcellular lumen formation and  
7 extension, we hypothesised that Shot overexpression (ShotOE) would induce extra  
8 subcellular branching events. Indeed, analysis of full-length ShotOE (*shotA-GFP*) in  
9 tracheal cells revealed that increasing Shot concentrations induced Extra-Subcellular  
10 Lumina (ESL) in GB and DB TCs (Fig. 2 A-C, G, H). Since MTs and actin are essential  
11 for subcellular lumen formation (1), we then asked whether supernumerary luminal  
12 branching was due to the MT- or the actin-binding domains present in the Shot molecule  
13 (33, 34). To this end, we overexpressed an isoform of Shot (ShotC-GFP) with a deletion  
14 of the first calponin domain (Fig. 2 M, N), resulting in a shorter acting binding domain  
15 (ABD), which binds actin very weakly or not at all (22, 25). The tracheal overexpression  
16 of *shotA* induced phenotypes in 95% of the embryos (n=20), with an average of 2 TC  
17 bifurcations *per* embryo (n=400). *shotC* overexpression induced phenotypes in 90% of  
18 the embryos (n=20), with an average of 2 TC bifurcations *per* embryo (n=400) (Fig. 2 G).  
19 In all cases, we could detect more MT bundles in TCs, associated with the ESLs (Figure  
20 S1). ShotA-GFP and ShotC-GFP displayed different localizations within the TC. Full-  
21 length ShotA-GFP localization can be detected at the cell-junctions, around the crescent  
22 lumen, in structures resembling MT-bundles, and throughout the cytoplasm, whereas  
23 ShotC-GFP localized more to the MT/lumen region, together with MT-bundles (Fig. S1),  
24 in agreement with the lack of actin-binding capability of ShotC isoform. Interestingly, we  
25 observed a highly ramified subcellular lumen when higher amounts of ShotC were  
26 expressed in tracheal cells (Fig. 2 J) suggesting that the effect of ShotOE in subcellular  
27 lumen branching was dosage dependent.

28

1 Tracheal overexpression of *shotC* phenocopied that of *shotA* in inducing ESLs (Fig. 2 D-  
2 F, G, H), suggesting that the ABD is not necessary for the induction of additional luminal  
3 branching events. In order to clarify this, we used two other isoforms of Shot: *shotΔCtail*,  
4 lacking the C-terminal MT-binding domain, and *shotCtail*, a truncated form containing  
5 only the C-terminal MT-binding domain (35) (Fig.2 M, N). Whereas overexpressing  
6 *shotΔ-Ctail* in TCs we could only detect a branching phenotype in 7% of embryos  
7 analysed (n=40), (Fig. 2 K), overexpression the C-tail domain alone induced TCs with  
8 extra branching in 23% of the embryos (n=40) (Fig. 2 L), indicating that the C-tail alone  
9 was sufficient to induce ESLs in TCs. Taken together these results using different Shot  
10 isoforms, lead us to conclude that the Shot MT-binding domain alone is sufficient for the  
11 extra branching events observed in ShotOE TCs.

12 ESLs were previously observed when higher numbers of centrosomes were present in  
13 TCs (8). We therefore asked if the observed extra branching phenotypes could be due  
14 to supernumerary centrosomes induced by ShotOE in TCs. Consequently, we quantified  
15 the number of centrosomes in the TCs of ShotOE embryos. In control TCs we detected  
16 an average of  $2,3 \pm 0,5$  (n=33) centrosomes per TC, and in ShotOE  $2,2 \pm 0,2$   
17 centrosomes per TC (n=33) (Fig. 3 A, B, D). In both conditions, and as previously  
18 described (8), this centrosome-pair was detected at the apical side of the TCs (Fig. 3 A,  
19 B). Besides, analysing ShotOE TCs at embryonic st.15, (n=16) we could detect that the  
20 ESL arose from the pre-existing subcellular lumen, distally from the centrosome pair (Fig.  
21 3 B' arrow). These data indicate that ShotOE did not change TC centrosome-number  
22 and induced ESL by a distinct mechanism from centrosome duplication.

23 In contrast with ShotOE alone (Fig. 3 B'), in *Rca1* mutants the bifurcated subcellular  
24 lumen arose from the apical junction and continued to extend during TC development  
25 (8). When we analysed the luminal origins in *Rca1*, ShotOE conditions, both types of  
26 ESL were detected in the same TC in 25% of the cases (n=12). In the same TCs two  
27 types of ESL were generated, one from the apical junction and another sprouted from  
28 the pre-existing lumen distally from the junction (Fig. 3 C, asterisks). In addition, the

1 effect of *Rca1* LOF and ShotOE was additive in producing TCs with a multiple-branched  
2 subcellular lumen (Fig. S2). These morphological ESL differences suggested that *Rca1*  
3 and *shot* operate in different ways in the *de novo* formation and branching of the  
4 subcellular lumen.

5

## 6 **Shot interacts with stable microtubules and actin**

7 Spectraplakin expression is critical in cells that require extensive and dynamic  
8 cytoskeleton reorganization, such as epithelial, neural, and migrating cells. Loss of  
9 spectraplakin function leads to a variety of cellular defects due to disorganised  
10 cytoskeletal networks (36). In a plethora of tissues and in cultured S2 cells, Shot can  
11 physically interact with different cytoskeletal components (23, 24, 37). Therefore, we  
12 investigated Shot localization and its interaction with MTs and actin in *wt* TCs.

13 We analysed live embryos using time-lapse imaging, and observed that Shot localization  
14 was extremely dynamic throughout subcellular lumen formation. We could detect Shot  
15 in the apical TC junction as well as extending together with the growing subcellular lumen  
16 (Movie 1 and Fig. S3 A). It was apparent that Shot localized dynamically with the growing  
17 luminal structures, showing a strong localization at the middle/tip of the extending TC  
18 (Movie 1 and Fig. S3 A).

19 In *wt* conditions F-actin and the actin-binding protein Moe concentrate strongly at the tip  
20 of the TC, but are also detected in the TC cytoplasm, and these different actin  
21 populations have been shown to be important for subcellular lumen formation and  
22 extension (1, 11). During TC elongation, MTs polymerise from the centrosome pair at  
23 the apical junction towards the tip of the cell, reaching the area of high Moe and F-actin  
24 accumulation (1, 8). So, we next analysed Shot localization in relation to the dynamically  
25 localized actin core present in the cytoplasm and at the tip of the migrating TC in live  
26 embryos (Movie 2, 3). In both GB and DB TCs we could detect a dynamic interaction  
27 between Shot and Moe (Movie 2 and Fig. S3 B) and Actin (Movie 3 and Fig. S3 C). As  
28 the lumen extended, Shot interacted with different actin populations, namely the actin



1 core and basal, filopodial actin (Fig. S3 B, C).  
2 We followed these analyses, observing endogenous Shot in fixed and antibody stained  
3 embryos. At early stages, when TCs started to elongate, we detected Shot co-localizing  
4 with Moe at the tip of the TC (Fig. 4 A). The overlap between Shot and Moe was  
5 maintained until late st.15 (Fig. 4 B). Then, we examined Shot localization in relation to  
6 MTs. Shot was strongly detected in the TC from early stages of lumen extension and  
7 until the end of TC elongation (Fig. 4 C-E). At the beginning of *de novo* lumen formation,  
8 when MTs emanated from the junction/centrosome pair, Shot co-localized with the first  
9 sprouting stable MTs (Fig. 4 C-E). The overlap between Shot and stable MTs was  
10 strongly observed also at embryonic st. 15 when a MT track preceded subcellular lumen  
11 detection (Fig. 4 C). At st. 16, both Shot and stable MTs localized to the apical side of  
12 the TCs in the area surrounding the subcellular lumen (Fig. 4 F).  
13 Shot localization within the TC suggested that the spectraplakins localized with stable  
14 MTs all around the nascent lumen and with the Moe/Actin at the tip of the TC, during the  
15 time of cell elongation and subcellular lumen formation. This suggests that Shot  
16 mediates the crosstalk between these two cytoskeletal components, helping their  
17 stabilization and organisation during subcellular lumen formation and growth (Fig. 4 F).

18

### 19 **Absence of Shot leads to disorganized microtubules and actin**

20 We then asked how actin and MTs were localized and organized in *shot<sup>3</sup>* mutant  
21 embryos. We analysed the different types of TC mutant phenotypes ranging from cases  
22 in which the TC did not elongate and the subcellular lumen was not formed, to cases in  
23 which the TC was able to elongate and form the lumen albeit not to *wt* levels (Fig. 5). In  
24 all cases, we found defects in both MTs and Moe accumulation in mutant TCs.  
25 Considering actin localization, in control embryos at early st. 16, Moe was strongly  
26 localized at the tip of the TC, in front of the tip of the growing lumen (86% of TCs  
27 analysed, n=21). Moreover, a few spots of Moe were detectable in the cytoplasm, around  
28 the subcellular lumen (Fig.5 A and Movie 2). In *shot<sup>3</sup>*, we observed reduced Moe

1 accumulation at the TC-tip and an increase of scattered spots into the cytoplasm (86%  
2 of TCs analysed, n= 23) (Fig. 5 B-D), indicating that Shot contributed to TC actin  
3 organization.  
4 Regarding MT-bundles, we observed stable MTs organized in longitudinal bundles  
5 around the subcellular lumen in control TCs (Fig. 5 E). In *shot<sup>3</sup>* TCs (n=20), we detected  
6 MT-bundle defects. In particular, we observed that when the TC was not elongated, MT  
7 bundles no longer localized to the apical region and seemed to be fewer than in *wt* (Fig.  
8 5 F). A general disorganization in MT bundles in respect to the control was also observed  
9 in TCs partially able to elongate a subcellular lumen (Fig. 5 G, H).  
10 These analyses, taken together with the previous analysis of Shot localization in *wt* TCs,  
11 suggested a spectraplakins role in organizing/stabilizing both MTs and Moe/Actin  
12 accumulation in the TC.

13

#### 14 **Subcellular branching depends on both actin and microtubule binding domains of** 15 **Shot**

16 In order to analyse how the different domains of Shot affected luminal development and  
17 branching, we expressed different isoforms of Shot in *shot<sup>3</sup>* mutant TCs. As described  
18 previously, *shot<sup>3</sup>* embryos displayed a variable expressivity in TC phenotypes. To  
19 simplify the quantification of the rescue experiments, we took in consideration the most  
20 severe luminal phenotype: the complete absence of a subcellular lumen. In *shot<sup>3</sup>*, we  
21 quantified that 22% of TCs (at the tip of GBs and DBs) did not develop a subcellular  
22 lumen at all (Fig. 1 L). Targeted expression of full-length ShotA in the trachea of *shot<sup>3</sup>*  
23 mutant embryos was able to rescue the subcellular lumen phenotype to the level of only  
24 6% of the TCs analysed (n=200) not developing a subcellular lumen (Fig. 6 C).

25 We then proceeded to molecular dissect the function of Shot in TCs. To do so, we used  
26 the three different constructs Shot: ShotC, Shot $\Delta$ Ctail and ShotCtail (Fig. 2 M). When we  
27 expressed ShotC in the tracheal TCs we found that 20% of TCs analysed (n=200), had

1 TCs with no lumen (Fig. 6 D), suggesting that the ABD domain is necessary for the  
2 correct *de novo* luminal morphogenesis.

3 We next expressed *shotC-tail* in order to address whether the Shot MT-binding domain  
4 alone could restore subcellular lumen formation. We observed that 24% of TCs analysed  
5 at the tip of GBs and DBs (n=250) were still not able to form a subcellular lumen (Fig. 6  
6 E), suggesting that the tracheal expression of *shotC-tail* was not enough to rescue the  
7 null phenotype. Finally, we expressed *shot $\Delta$ C-tail* to test whether Shot without the MT-  
8 binding domain could restore subcellular lumen formation. We observed that 16% of TCs  
9 analysed at the tip of GBs and DBs (n=250) were still unable to form a subcellular lumen  
10 (Fig. 6 F). Taken together, these analyses suggested that full-length isoform A, allowing  
11 Actin-MT crosslinking is necessary for correct *de novo* subcellular lumen formation.

12

13 In order to further test the hypothesis that full-length Shot is needed to correctly form a  
14 subcellular lumen, we analysed *shot<sup>kakP2</sup>* mutant phenotype. This allele carries an  
15 insertion of a transposable element into the intron between the second and the third  
16 transcriptional start site of *shot* abolishing all isoforms containing the first Calponin  
17 domain (CH1) and interfering with Shot actin-binding activity (33). The penetrance and  
18 expressivity of the phenotype observed in *shot<sup>kakP2</sup>* TCs was very similar to *shot<sup>3</sup>* null  
19 allele with 18% of these (n=600; 300 ganglionic and 300 dorsal TCs) not forming a  
20 subcellular lumen at all (Fig. 6 G). In addition, *shot<sup>kakP2</sup>* TCs displayed the same MT and  
21 actin disorganization phenotypes as *shot<sup>3</sup>* TCs (Fig. S4). Phenotypic data from *shot<sup>kakP2</sup>*  
22 together with data from transgenic rescues with the *ShotC* construct, lacking the CH1  
23 domain, indicate that Shot full-length is required for *de novo* subcellular lumen formation.  
24 Since the actin and MT binding domains were shown to be necessary for the proper  
25 formation of a subcellular lumen, we asked whether it was necessary to have both  
26 domains in the same protein or if simply the independent presence of these domains  
27 was enough to generate a subcellular lumen. To do so, we generated transheterozygous  
28 flies expressing two different Shot isoforms, *Shot<sup>kakP2</sup>* and *Shot <sup>$\Delta$ EGC</sup>*. *Shot <sup>$\Delta$ EGC</sup>* is a

1 truncated protein, lacking the EF-hand, the Gas2 and the C-tail domains of Shot, leading  
2 to complete loss of the MT-binding activity (38). The analysis of *shot*<sup>ΔEGC</sup> mutant TC  
3 phenotypes revealed that 18% of TCs (n=400; 200 ganglionic and 200 dorsal TCs) did  
4 not develop a TC lumen at all (Fig. 6 H) and that *shot*<sup>ΔEGC</sup> mutant TCs displayed MT and  
5 actin disorganization phenotypes (Fig. S4). Interestingly, in *shot*<sup>ΔEGC</sup> mutant TCs, actin  
6 was found to be disorganized throughout the cytoplasm (and not at the tip as in control  
7 TCs) but in higher levels than in *shot*<sup>kakP2</sup> TCs (Fig. S4). This suggests that the actin-  
8 binding domain present in *shot*<sup>ΔEGC</sup> is able to organize the actin in TCs albeit not to wt  
9 levels.

10 In *shot*<sup>ΔEGC</sup>/*shot*<sup>kakP2</sup> transheterozygous embryos, Shot molecules contained exclusively  
11 either the CH1 or the C-tail, but neither molecule had actin- and MT-binding activity  
12 simultaneously. These embryos displayed the same TC phenotype as either  
13 homozygous mutant (18% TCs with no lumen, n=400) (Fig. 6 I), indicating that both the  
14 actin- and the MT-binding domains need to be present in the same Shot molecule for  
15 proper TC subcellular lumen formation.

16 Taken together these results indicate that Shot is able to mediate the crosstalk between  
17 MTs and actin during subcellular lumen formation, via its MT and actin-binding domains  
18 and that these have to be present in the same molecule for proper subcellular lumen  
19 formation.

20

## 21 **Increased levels of Shot are induced in TCs by DSRF**

22 The TC-specific transcription factor *bs*/DSRF is important for TC specification and  
23 growth, and has been suggested to regulate the transcription of genes that modify the  
24 cytoskeleton (9, 39). Considering the luminal phenotypes associated with *bs* LOF in TCs  
25 and the role of MTs in subcellular luminal formation, we asked whether *shot* expression  
26 in TCs could be regulated by DSRF.

27 In order to test this, we searched *in silico* for DSRF binding sites in the promoter regions  
28 of all *shot* isoforms using the Matscan software (40) and the reported position weight

1 matrix (PWM) corresponding to SRF (41) (Supplementary Table 2). We found 7 regions  
2 with at least one putative binding site (binding score larger than 70% of maximum value)  
3 within 2000 bases of the *shot* annotated TSS (Fig. 7 D and Supplementary Table 1).  
4 These regions mapped to the locations of known Shot promoters (Fig. 7 D) (36). We  
5 then asked if lower Shot levels could be detected in *bs* mutant TCs. Indeed, when  
6 analysing *bs* in comparison to *wt* TCs, we could detect lower levels of endogenous Shot  
7 protein (Fig. 7 A-C). To confirm this, we analysed the TC phenotype of *bs* embryos upon  
8 tracheal expression of *shot* in these cells. We observed that increasing *shot* expression  
9 in TCs resulted in rescue of *de novo* lumen formation in *bs* TCs (Fig. 7 E-K). Taken  
10 together these results indicate that at least part of the luminal phenotypes associated  
11 with *bs* LOF in TCs are due to lower levels of the Actin/MT binding activity of Shot.

12

### 13 **Shot and Tau functionally overlap during subcellular lumen formation and** 14 **branching**

15 Previous *Drosophila* work suggested that Shot could display potential functional overlap  
16 with Tau in microtubule stabilisation (35, 42). To assess this functional overlap during  
17 TC subcellular branching, we started by overexpressing Tau in TCs using GAL4 induced  
18 expression. Upon overexpression of Tau in otherwise *wt* TCs, we detected ESLs in 93%  
19 of TCs, which is comparable to the ShotOE phenotype (Fig. 8 A-C). Like in ShotOE, this  
20 effect was dosage dependent, with more TCs with ESLs when more Tau copies were  
21 expressed (Fig. 8 C). We then tried to rescue the *shot* LOF phenotype by targeted  
22 expression of Tau in TCs. Again, this effect was dosage dependent. We achieved a 64%  
23 rescue of the *shot* mutant phenotype with two copies of Tau expressed, indicating that  
24 Tau can execute a similar function to Shot in *de novo* subcellular lumen formation (Fig.  
25 8 D-L).

26 We then asked whether *tau* null mutants displayed any TC luminal phenotypes. For this  
27 we analysed a *tau* deletion mutant *tau*<sup>MR22</sup> previously shown to have nervous system  
28 defects (42). *tau*<sup>MR22</sup> null mutant TCs showed defects in subcellular lumen directionality,

1 but not in subcellular lumen formation (Fig. 8 D, F). We then proceeded to analyse TCs  
2 in double mutants for *shot*<sup>3</sup> and *tau*<sup>MR22</sup> (*shot-tau*). These double mutants showed higher  
3 numbers of TCs without lumen (85%) than TCs from *shot*<sup>3</sup> (22%) or *tau*<sup>MR22</sup> (3%) alone,  
4 or a mere sum of these phenotypes, indicating a synergistic genetic effect between *shot*  
5 and *tau* (Fig. 8 D-H). Despite the strong phenotypes, *shot-tau* mutants have the correct  
6 number of cells per branch and express DSRF in TCs (Fig. S5). Furthermore, using a  
7 mouse anti-Tau antibody, we could detect Tau colocalizing with the growing lumen in  
8 TCs (Fig. 8 K). These results indicate that, as seen in neurons (42), in tracheal TCs Shot  
9 and Tau functionally overlap in subcellular lumen formation and branching.

10

### 11 **Shot is required for subcellular luminal branching at larval stages**

12 During larval stages, TCs ramify extensively to form many branches from the same cell  
13 body, long cytoplasmic extensions that form one cytoplasmic membrane-bound lumen  
14 each (3, 16). We questioned if Shot was also necessary for the subcellular branching  
15 and lumen extension in these larval cells. To answer this, we expressed different  
16 isoforms of Shot, Shot-RNAi and Tau in TCs from embryonic stages with a TC specific  
17 driver (DSRF-GAL4) and analysed the phenotypes on branching and ESL formation at  
18 the end of the larval stages (Fig. 9). Downregulation of Shot induced TCs with lower  
19 levels of branching and fewer lumina (Fig. 9 B, G, I). Whereas in the *wt* each TC branch  
20 is filled by a subcellular lumen, in Shot-RNAi TCs these were reduced to 37% of the TCs  
21 and even so absent in most branches (Fig. 9 B and G). Also, on average, each *wt* TC  
22 develops 17 branch points, but Shot-RNAi TCs only developed an average of 6,5 branch  
23 points each (n=8) (Fig. 9 B and I). We then overexpressed Shot full-length (ShotA-GFP  
24 aka ShotOE condition) and could not detect extra branching points in TCs, suggesting  
25 that more than just an increased Actin-MT crosstalk is needed for the induction of TCs  
26 with supernumerary cytoplasmic extensions. Nonetheless, overexpression of ShotA,  
27 ShotCtail and Tau induced ESL in TCs, with 2 or more lumina in all cells analysed (n=10)  
28 (Fig. 9 C-E and H). Like in embryos, targeted expression of Shot-ΔC-tail did not induce

1 ESL in larval TCs (Fig. 9 F and H). Taken together, these results indicate that Shot is  
2 necessary for larval lumen formation and branching and that Actin-MT crosstalk by Shot  
3 or Tau is sufficient for ESL formation within each TC cytoplasmatic extension.

4

## 5 **DISCUSSION**

6 In this study, we analysed the importance of MT-actin crosstalk through Shot and Tau in  
7 subcellular lumen formation in *Drosophila* embryonic and larval tracheal cells. Our work  
8 reveals novel insights into the formation of lumina by single-cells. First, that a  
9 spectraplakins is involved in the crosstalk between actin and MTs in tracheal TCs and  
10 that this crosstalk is necessary for *de novo* lumen formation. Absence of Shot leads to  
11 defects in microtubule and actin organization and a profound alteration of the  
12 cytoskeleton in TCs (Fig. 10 A, C). Second, that once a primary lumen is formed *de novo*  
13 in TCs, neither actin-MT crosstalk, nor supernumerary centrosomes, are necessary for  
14 the formation of new supernumerary lumina (ESLs). New lumina can arise from  
15 branching points along the length of the pre-existing lumen, only by MT stabilisation (Fig.  
16 10 B, D). In these cases, we can form ESLs acentrosomally, probably from the MTOC  
17 activity provided by the gamma-tubulin present along the crescent lumen (1). Third,  
18 spectraplakins activity is necessary to organize MTs and actin in TCs. Fourth, increased  
19 levels of Shot are induced in TCs by DSRF, and Shot can rescue the subcellular lumen  
20 formation phenotypes in *bs* mutants. This agrees with previous observations in other  
21 systems where *bs* and *shot* mutants display similar phenotypes (43). And fifth, high-  
22 levels of Tau can replace Shot in subcellular lumen formation and branching.

23

### 24 **Shot promotes subcellular branching by organizing and mediating the crosstalk** 25 **between microtubules and actin**

26 Previously, it was shown that Shot was involved in tracheal fusion cell anastomosis  
27 during embryonic development (25). It was observed that Shot accumulates at E-  
28 cadherin-dependent contacts between fusion cells and *shot* LOF disrupts this contact

1 leading to cell-fusion phenotypes. In these cells, interactions of Shot with F-actin and  
2 microtubules are functionally redundant and both targeted expression of ShotC or ShotA  
3 is sufficient to rescue the cell-fusion phenotype (25). Our results are more akin to what  
4 has been reported in neuronal growth cones, and both actin and MT binding domains of  
5 Shot are required for TC extension and subcellular lumen formation (Fig. 10 A). In  
6 neurons, like in tracheal cells, ShotC is unable to rescue the phenotype caused by *shot*  
7 LOF, which is only rescued by expression of the full-length ShotA isoform (24). Shot has  
8 also been shown to be required for sealing epithelial sheets during dorsal closure (38).  
9 In these epithelial cells, Shot acts as a MT-actin crosslinker to regulate proper formation  
10 of the MT network. As in the case of tracheal TCs presented here, the actin- and  
11 microtubule-binding activities of Shot are simultaneously required in the same molecule,  
12 indicating that like in TCs Shot is engaged as a physical crosslinker also during dorsal  
13 closure (38).

14

15 MTs and the actin cytoskeleton perform many functions in tracheal TCs that are  
16 regulated by different actin- and MT-binding proteins. While mediators of actin function,  
17 such as Ena (1), and of MT function, like D-Lissencephaly-1 (DLis-1), have been  
18 identified previously, we show here that Shot is able to crosstalk MTs and actin during  
19 subcellular lumen formation. In Shot LOF conditions, MTs and actin are disorganized.  
20 Consequently, this Shot crosslinking function is essential for *de novo* lumen formation  
21 and extension. It has been previously described that in TCs of mutants affected in MT  
22 organization, the actin-network is not perturbed (1), so the “actin phenotype” observed  
23 in *shot* LOF cannot be a consequence of defects in the MT network. This observation  
24 indicates a possible spectraplaklin function in organizing TC actin in agreement with  
25 previous observations that Shot and ACF7 can promote filopodia formation (37, 44).

26

27 **Shot expression is regulated by DSRF in TCs**



1 Our results show that molecular levels of Shot are important for cytoskeletal  
2 rearrangements, indicating that there is a dosage dependent effect in lumen formation  
3 and extension as well as in luminal branching events. Shot is present in many cells during  
4 development but Shot level regulation is likely to be more important in cells such as  
5 neurons and tracheal terminal cells, due to their morphology (34). *bs*/DSRF is a TC-  
6 specific transcription factor, whose expression is triggered by Bnl signalling (9, 45), and  
7 is required for TC cytoskeletal organisation (1). DSRF has also been shown to be  
8 necessary not just for the establishment of TC fate, but to ensure the progression of TC  
9 elongation (32). Cytoskeletal organisation and remodelling as well as TC elongation are  
10 tightly coupled during subcellular lumen formation and in *bs* mutants actin accumulation  
11 was impaired at the TC tip (1). We observe a similar actin phenotype in Shot mutants  
12 (Fig. 5 A-D) suggesting that the actin defects observed in DSRF mutants may be due to  
13 a lower expression of Shot in these cells.

14

### 15 **Shot and Tau functionally overlap in subcellular lumen formation and branching**

16 It has been suggested that spectraplakins functionally overlap with structural  
17 microtubule-associated-proteins (MAPs). Shot displays a strong functional overlap with  
18 Tau in MT stabilization leading to the adequate delivery of synaptic proteins in *Drosophila*  
19 axons (42). In addition, it has been proposed that a loss of MAP function in mammals  
20 results in a relatively mild phenotype due to a functional compensation accomplished by  
21 spectraplakins (46, 47). Furthermore, the effect of the complete lack of Shot function  
22 during dorsal closure is very subtle (38), hinting that in another *Drosophila* organ, Shot  
23 function might have overlaps with other MAPs.

24 Our overexpression and genetic data suggest that also in the context of subcellular  
25 lumen formation these two proteins functionally overlap. When we tested the tracheal  
26 overexpression of *tau* in *wt* background, we observed extra subcellular lumina with  
27 morphology very similar to the one caused by ShotOE. Moreover, Tau overexpression  
28 in tracheal cells was able to rescue the *shot* LOF phenotype similarly to ShotA

1 expression. We propose that Tau's rescuing capability does not depend only on its  
2 classical MT-stabilization activity, since expression of ShotC and ShotC-tail in tracheal  
3 cells was not able to restore subcellular lumen formation. Tau MT-binding is probably  
4 just one of its functions in TCs. In fact, Tau has been show to co-organize dynamic MTs  
5 and the actin-network in cell-free systems and growth cones (48-50). Our rescue and  
6 double mutant analyses suggest that in TCs, Shot and Tau functionally overlap in  
7 organizing the coordination between MT-bundling and actin cytoskeleton crosstalk (Fig.  
8 10 A, B).

9

### 10 **Larval lumen formation and branching**

11 TC subcellular lumen formation starts at embryonic stages but most of its elongation and  
12 branching occurs during the extensive body growth of the third instar larva (L3). Some  
13 mutants have been reported to generate larger TCs with higher numbers of branches.  
14 Such mutants included the Hippo pathway member *warts/lats1* (aka *miracle-gro*), and  
15 the TOR pathway inhibitor, *Tsc1* (aka *jolly green giant*) (16). In addition, activation of the  
16 FGF Receptor (Btl) pathway in TCs gives rise to ectopic branches (17, 51). Interestingly,  
17 in all these cases, mutant TCs develop a higher number of branches but no reported  
18 ESL per branch. In larvae, as in embryonic TCs, actin is present at the basal plasma  
19 membrane and at the luminal/apical membrane. The connection between the basal actin  
20 network and the outer plasma membrane is made through Talin, which links the network  
21 to the extracellular matrix (ECM) via the integrin complex (52). Regulation of the luminal  
22 actin is done by Bitesize (Btsz), a Moe interacting protein (13). These interactions with  
23 actin are required for proper TC morphology, and mutations in either the *Drosophila* Talin  
24 gene *rhea* or *btsz* induce multiple convoluted lumina per TC branch (13, 52). *rhea* and  
25 *btsz* ESLs seem to be misguided within the TC and present a series of U-turns and loops  
26 we did not observe in *shot* mutants. Also, mutations in *rhea* and *btsz* do not induce  
27 embryonic TC luminal phenotypes, suggesting that despite their interactions with actin  
28 the mechanism of action during subcellular lumen formation and stabilization is different.

1 They do not seem to interact with MTs and they might have a more structural/less  
2 dynamic role in larval subcellular lumen formation. Our results suggest that Shot is able  
3 to induce larval ESLs by the same mechanism as in embryos. By modulating a dynamic  
4 crosstalk between MTs and actin that induces acentrosomal luminal branching.  
5 However, albeit necessary for larval luminal branching excess Shot alone is not sufficient  
6 to induce extra branching in TCs. Perhaps ShotOE TCs are able branch their subcellular  
7 lumen but lack a specific spatial cue to induce single-cell branching. This cue could be  
8 such as the one provided by a hypoxic tissue secreting the FGFR ligand, Bnl, which  
9 would allow for the cytoplasmic extensions needed to increase single-cell TC branching.

10

### 11 **Shot and lumen formation in other organisms**

12 The spectraplakin protein family of cytoskeletal regulators is present throughout the  
13 animal kingdom. In the most commonly studied model organisms we find VAB-10 in the  
14 worm *Caenorhabditis elegans*, and, in vertebrates, dystonin (also known as Bullous  
15 Pemphigoid Antigen 1/BPAG1) and Microtubule-Actin Crosslinking Fac- tor 1 (MACF1;  
16 also known as Actin Crosslinking Family 7/ACF7, Macrophin, Magellan) (34). They are  
17 usually strongly expressed in the nervous system and most of their functions have been  
18 unraveled by studying nervous system development and axonal cell biology (53).  
19 Spectraplakin roles have also been reported in cell-cell adhesion and cell migration (31).  
20 Recently, attention has gone into the role of spectraplakins not only during normal  
21 cellular processes but also in human disease, from neurodegeneration to infection and  
22 cancer (53). However, not much is known about a role for spectraplakins neither during  
23 lumen formation nor during subcellular branching events. Here, we provide evidence for  
24 the involvement of the *Drosophila* spectraplakin Shot in subcellular lumen formation in  
25 branching. Through its actin- and MT- binding domains, Shot is necessary for subcellular  
26 lumen formation and branching (Fig.10). This function can be functionally replaced by  
27 Tau, another microtubule associated protein which has been shown to be able to

1 crosslink MTs and actin (50). A similar crosslink between MTs and actin may in place  
 2 during vertebrate lumen formation and in other subcellular branching events.

3

4 **MATERIALS AND METHODS**

5

| Reagent type                                  | Designation                              | Source or reference | Additional information   |
|-----------------------------------------------|------------------------------------------|---------------------|--------------------------|
| Genetic reagent<br>( <i>D. melanogaster</i> ) | <i>shot</i> <sup>3</sup>                 | BDSC                | Lee et al., 2000         |
| Genetic reagent<br>( <i>D. melanogaster</i> ) | <i>shot</i> <sup>tkakP2</sup>            | BDSC                | Gregory and Brown, 1998  |
| Genetic reagent<br>( <i>D. melanogaster</i> ) | <i>shot</i> <sup>ΔEGC</sup>              | F. Jankovics        | Takács et al., 2017      |
| Genetic reagent<br>( <i>D. melanogaster</i> ) | <i>Rca1</i> <sup>G012</sup>              | S.J. Araújo         | Ricolo et al., 2016      |
| Genetic reagent<br>( <i>D. melanogaster</i> ) | <i>tau</i> <sup>[MR22]</sup>             | BDSC                | Doerflinger et al., 2003 |
| Genetic reagent<br>( <i>D. melanogaster</i> ) | <i>btl::moeRFP</i>                       | M. Affolter         | Ribeiro et al., 2004,    |
| Genetic reagent<br>( <i>D. melanogaster</i> ) | <i>btl-Gal4</i>                          | BDSC                | Shiga Y., 1996           |
| Genetic reagent<br>( <i>D. melanogaster</i> ) | <i>DSRF4X-Gal4</i>                       | A.Ghabrial          | unpublished              |
| Genetic reagent<br>( <i>D. melanogaster</i> ) | <i>UAS-shot L(A)</i><br><i>GFP</i>       | BDSC                | Lee and Kolodziej, 2002  |
| Genetic reagent<br>( <i>D. melanogaster</i> ) | <i>UAS-shot L(C)-</i><br><i>GFP</i>      | BDSC                | Lee and Kolodziej, 2002  |
| Genetic reagent<br>( <i>D. melanogaster</i> ) | <i>UAS-shot-LA-</i><br><i>ΔCtail-GFP</i> | N. Sanchez-Soriano  | Alves-Silva et al., 2012 |
| Genetic reagent<br>( <i>D. melanogaster</i> ) | <i>UAS-shot-LA-</i><br><i>Ctail-GFP</i>  | N. Sanchez-Soriano  | Alves-Silva et al., 2012 |
| Genetic reagent<br>( <i>D. melanogaster</i> ) | <i>UAS-TauGFP</i>                        | M. Llimargas        | Llimargas et al., 2004   |
| Genetic reagent<br>( <i>D. melanogaster</i> ) | <i>UAS-srcGFP</i>                        | BDSC                | Kaltschmidt et al., 2000 |
| Genetic reagent<br>( <i>D. melanogaster</i> ) | <i>UAS-shot RNAi</i>                     | BDSC                | -                        |
| Genetic reagent<br>( <i>D. melanogaster</i> ) | <i>shot::GFP</i>                         | J.Pastor-Pareja     | Sun T. et al., 2019      |

|          |                                                    |                                 |        |
|----------|----------------------------------------------------|---------------------------------|--------|
| Antibody | mouse<br>anti GASP                                 | DSHB                            | 1:5    |
| Antibody | rat<br>anti-DEcad                                  | DSHB                            | 1:100  |
| Antibody | guinea Pig<br>anti-CP309                           | V. Brodou                       | 1:1000 |
| Antibody | rabbit and rat<br>anti-DSRF                        | J. Casanova                     | 1:500  |
| Antibody | goat, rabbit Anti<br>GFP                           | Roche /<br>Jackson              | 1:500  |
| Antibody | chicken, rabbit,<br>mouse<br>anti-βgal             | Cappel/<br>Promega/<br>Abcam    | 1:500  |
| Antibody | mouse anti-<br>acetylated tubulin                  | Sigma                           | 1:100  |
| Antibody | guinea pig<br>anti-Shot                            | K. Röper                        | 1:1000 |
| Antibody | mouse anti-Tau-1                                   | Sigma-<br>Aldrich               | 1:200  |
| Antibody | Cy2-conjugated<br>secondary<br>antibody            | Jackson<br>Labs                 | 1:500  |
| Antibody | Cy3-conjugated<br>secondary<br>antibody            | Jackson<br>Labs                 | 1:500  |
| Antibody | Cy5-conjugated<br>secondary<br>antibodies          | Jackson<br>Labs                 | 1:500  |
| Antibody | Alexa 488<br>conjugated<br>secondary<br>antibodies | Thermo<br>Fischer<br>Scientific | 1:500  |
| Antibody | Alexa 647<br>conjugated<br>secondary<br>antibodies | Thermo<br>Fischer<br>Scientific | 1:500  |
| Antibody | Alexa 555<br>conjugated<br>secondary<br>antibodies | Thermo<br>Fischer<br>Scientific | 1:500  |

|             |                             |                           |       |
|-------------|-----------------------------|---------------------------|-------|
| Antibody    | biotinylated anti mouse IgM | Thermo Fischer Scientific | 1:500 |
| Probe       | CBP                         | J. Casanova               | 1:500 |
| Probe       | Fluostain                   | Sigma-Aldrich             | 1:300 |
| AB solution | Vectastain ABC kit          | Vector Laboratories       | 1:200 |

1

## 2 **D. melanogaster strains and genetics**

3 *shot*<sup>3</sup> (Lee et al., 2000), *shot*<sup>kakP2</sup> (Gregory and Brown, 1998), *shot*<sup>ΔEGC</sup> (Takács et al.,  
4 2017), *Rca1*<sup>G012</sup> (Ricolo et al., 2016), *tau*<sup>[MR22]</sup> (Doerflinger et al., 2003)  
5 *btl::moerFP* (Ribeiro et al., 2004), *btl-Gal4* (Shiga Y 1996), *DSRF4x-Gal4* (gift from A.  
6 Ghabrial) *UAS-shot L(A) and GFP and UAS-shot L(C)-GFP* (Lee and Kolodziej 2002),  
7 *UAS-shot-L(A)-ΔCtail-GFP and UAS-shot-L(A)-Ctail-GFP* (Alves-Silva et al. 2012),  
8 *UAS-TauGFP* (Limargas et al., 2004), *UAS-srcGFP* (Kaltschmidt et al., 2000), *UAS-shot*  
9 *RNAi* (Bloomington stock centre), *shot::GFP* (Sun., T., 2019).

10 Chromosomes were balanced over LacZ or GFP-labelled balancer chromosomes.  
11 Overexpression and rescue experiments were carried out either with *btl-GAL4* or  
12 *DSRF4X-GAL4* at 25°C.

13

## 14 **Immunohistochemistry, image acquisition, and processing**

15 All stage embryos, collected on agar plates overnight (O/N), were dechorionated with  
16 bleach and fixed for 20 min (or 10 min for MT staining) in 4% formaldehyde, PBS (0.1 M  
17 NaCl 10 mM phosphate buffer, pH 7.4) / Heptane 1:1. Washes were done with PBT  
18 (PBS, 0.1% Tween). Primary antibody incubation was performed in fresh PBT-BSA O/N  
19 at 4°C. Secondary antibody incubation was done in PBT-BSA at room temperature (RT)  
20 in the dark for 2h.

21 For DAB histochemistry (used to recognize 2A12/anti-Gasp antibody) after incubation  
22 with secondary antibody (mouse IgM biotinylated antibody) embryos were treated with  
23 AB solution for 30 min at R/T (Avidin-Biotinylated Horseradish Peroxidase H from  
24 Vectastain-ABC KIT of Vector Laboratories 1:200 in PBT).

25 Embryos were incubated with the DAB solution (DAB 0,12% Nickel-Sulphate-Cobalt  
26 Chloride, 0,3 %H<sub>2</sub>O<sub>2</sub>) until black colour was achieved, usually 2/3 min.

27 The primary antibodies used were: mouse anti-Gasp (2A12) 1:5, rat anti-DE-cad  
28 (DCAD2) 1:100, from Developmental Studies Hybridoma Bank (DSHB), guinea pig anti-  
29 CP3019 (from V. Brodu) 1:1000, rabbit and rat anti-DSRF 1:500 (both produced by N.

1 Martín in J. Casanova Lab), goat and rabbit anti-GFP 1:500 (From Roche and Jackson),  
2 chicken, rabbit and mouse anti- $\beta$ gal 1:500 (Cappel, Promega, Abcam), mouse anti  
3 acetylated tubulin 1:100 (Sigma), guinea pig anti-Shot 1:1000 (K. Röper), mouse anti-  
4 Tau-1 (Sigma Aldrich).  
5 Cy3, Cy2 or Cy5 conjugated secondary antibody (Jackson Immuno Research) or Alexa  
6 488, Alexa 647 and Alexa 555 conjugated secondary antibody (Thermo Fischer  
7 Scientific) from donkey and/or goat were used 1:500 in PBT 0,5% BSA. Two probes, to  
8 label luminal chitin were used: Fluostain 1:200 (Sigma), and chitin binding protein CBP  
9 1:500 (produced by N. Martín in J. Casanova Lab). Bright field photographs were taken  
10 using a Nikon Eclipse 80i microscope with a 20X or 40X objective. Photoshop 21.1.1  
11 was used for measurements, adjustments and to assemble figures. Florescence  
12 confocal images of fixed embryos where obtained with Leica TCS-SPE system using  
13 20X and 63X (1.40-0.60 oil) objectives (Leica). Fiji (Imagej 1.47) (54) was used for  
14 measurements and adjustments. The images shown are, otherwise stated in the text,  
15 max-intensity projection of Z-stack section.

16

#### 17 **Quantification and Statistics**

18 Total number of embryos and TCs quantified (n) are provided in the figure legends.  
19 Measurement were imported and treated in Microsoft Excel, where graphics were  
20 generated. Error bars graphics and  $\pm$  in text denote Standard Error of the Mean (SEM)  
21 or Standard deviation (SD). Statistical analysis were performed applying the T-test.  
22 Differences were considered significant when  $p < 0,05$ . In graphics; \* $p < 0.05$ , \*\* $p < 0.01$ ,  
23 \*\*\* $p < 0.001$ .

24

#### 25 **Time-lapse imaging**

26 Dechorionated embryos were immobilised with glue on a coverslip and covered with Oil  
27 10-S Voltalef (VWR). To visualise tracheal Shot *in vivo*, *btIGAL4UASShotC-GFP* was  
28 used in the indicated backgrounds. Actin in tracheal cells was visualised with  
29 *btI::moeRFP* or *btIGAL4UASlifeActRFP* where indicated. Imaging was done with a  
30 spectral confocal microscope Leica TCS SP5. The images were acquired for the times  
31 specified over 50-75  $\mu$ m from st. 15 embryos; Z-projections and movies were assembled  
32 using Fiji (54).

33

#### 34 **ACKNOWLEDGMENTS**

35 We are grateful to M. Llimargas and our lab colleagues for comments on the manuscript.

36 We thank J. Casanova and F. Serras for the support given during throughout this study.

1 We thank A. Prokop, N. Sanchez-Soriano, K. Roeper, F. Jankovics and the Bloomington  
2 *Drosophila* Stock Center (BDSC) for fly stocks and reagents. Thanks also go to L. Bardia,  
3 A. Lladó, N. Giakoumakis and J. Colombelli from the IRB-ADMF for assistance and  
4 advice with confocal microscopy and software; C. Stephan-Otto Attolini from the IRB  
5 Bioinformatics/Biostatistics Facility; E. Fuentes, R. Mendez and M. Lledós for assistance  
6 in some experiments. D.R. is the recipient of a Juan de la Cierva post-doctoral fellowship  
7 from the Spanish *Ministerio de Ciencia, Innovación y Universidades* (FJCI201732443)  
8 and was previously funded by and FPU fellowship (FPU12/05765). This work was  
9 supported by the Universitat de Barcelona, Generalitat de Catalunya (2017 SGR 1455)  
10 and the Spanish *Ministerio de Ciencia, Innovación y Universidades* (PGC2018-099465-  
11 B-I00).

12

### 13 **Author contributions**

14 Conceptualization: SA; Methodology and Experiments: DR and SA; Analysis: DR and  
15 SA; Writing, review and editing: DR and SA; Supervision and Funding: SA.

16

### 17 **Declaration of interests**

18 The authors declare no conflicting interests

19

20

### 21 **REFERENCES**

- 22 1. Gervais L, Casanova J. In vivo coupling of cell elongation and lumen formation  
23 in a single cell. *Curr Biol*. 2010;20(4):359-66.
- 24 2. Sigurbjörnsdóttir S, Mathew R, Leptin M. Molecular mechanisms of de novo  
25 lumen formation. *Nat Rev Mol Cell Biol*. 2014;15(10):665-76.
- 26 3. Best BT. Single-cell branching morphogenesis in the *Drosophila* trachea.  
27 *Developmental Biology*. 2019;451(1):5-15.
- 28 4. Affolter M, Montagne J, Walldorf U, Groppe J, Kloter U, LaRosa M, et al. The  
29 *Drosophila* SRF homolog is expressed in a subset of tracheal cells and maps within a  
30 genomic region required for tracheal development. *Development*. 1994;120(4):743-53.
- 31 5. Posern G, Treisman R. Actin's together: serum response factor, its  
32 cofactors and the link to signal transduction. *Trends in Cell Biology*. 2006;16(11):588-96.



- 1 6. Lebreton G, Casanova J. Specification of leading and trailing cell features during  
2 collective migration in the *Drosophila* trachea. *Journal of Cell Science*. 2014;127(Pt  
3 2):465-74.
- 4 7. Fischer RS, Lam P-Y, Huttenlocher A, Waterman CM. Filopodia and focal  
5 adhesions: An integrated system driving branching morphogenesis in neuronal  
6 pathfinding and angiogenesis. *Developmental Biology*. 2019;451(1):86-95.
- 7 8. Ricolo D, Deligiannaki M, Casanova J, Araújo SJ. Centrosome Amplification  
8 Increases Single-Cell Branching in Post-mitotic Cells. *Curr Biol*. 2016;26(20):2805-13.
- 9 9. Guillemin K, Groppe J, Ducker K, Treisman R, Hafen E, Affolter M, et al. The  
10 pruned gene encodes the *Drosophila* serum response factor and regulates cytoplasmic  
11 outgrowth during terminal branching of the tracheal system. *Development*.  
12 1996;122(5):1353-62.
- 13 10. Schottenfeld-Roames J, Rosa JB, Ghabrial AS. Seamless Tube Shape Is  
14 Constrained by Endocytosis-Dependent Regulation of Active Moesin. *Curr Biol*.  
15 2014;24(15):1756-64.
- 16 11. Oshima K, Takeda M, Kuranaga E, Ueda R, Aigaki T, Miura M, et al. IKK epsilon  
17 regulates F actin assembly and interacts with *Drosophila* IAP1 in cellular morphogenesis.  
18 *Curr Biol*. 2006;16(15):1531-7.
- 19 12. Okenve-Ramos P, Llimargas M. Fascin links Btl/FGFR signalling to the actin  
20 cytoskeleton during *Drosophila* tracheal morphogenesis. *Development*.  
21 2014;141(4):929-39.
- 22 13. Jayanandanan N, Mathew R, Leptin M. Guidance of subcellular tubulogenesis by  
23 actin under the control of a synaptotagmin-like protein and Moesin. *Nature*  
24 *Communications*. 2014;5:3036.
- 25 14. Whitten JM. The Post-embryonic Development of the Trachea! System in  
26 *Drosophila melanogaster*. *Journal of Cell Science*. 1957  
27 ;s3-98(41):1-30.
- 28 15. Baer MM, Bilstein A, Leptin M. A clonal genetic screen for mutants causing  
29 defects in larval tracheal morphogenesis in *Drosophila*. *Genetics*. 2007;176(4):2279.
- 30 16. Ghabrial AS, Levi BP, Krasnow MA. A Systematic Screen for Tube  
31 Morphogenesis and Branching Genes in the *Drosophila* Tracheal System. *PLoS Genet*.  
32 2011;7(7):e1002087.
- 33 17. Jarecki J, Johnson E, Krasnow MA. Oxygen regulation of airway branching in  
34 *Drosophila* is mediated by branchless FGF. *Cell*. 1999;99(2):211-20.
- 35 18. Dogterom M, Koenderink GH. Actin-microtubule crosstalk in cell biology. *Nature*  
36 *Reviews Molecular Cell Biology*. 2019;20(1):38-54.
- 37 19. Suozzi KC, Wu X, Fuchs E. Spectraplakins: master orchestrators of cytoskeletal  
38 dynamics. *The Journal of Cell Biology*. 2012;197(4):465-75.
- 39 20. Röper K, Gregory SL, Brown NH. The 'spectraplakins': cytoskeletal giants with  
40 characteristics of both spectrin and plakin families. *Journal of Cell Science*. 2002;115(Pt  
41 22):4215-25.
- 42 21. Gregory SL, Brown NH. kakapo, a gene required for adhesion between and within  
43 cell layers in *Drosophila*, encodes a large cytoskeletal linker protein related to plectin and  
44 dystrophin. *The Journal of Cell Biology*. 1998;143(5):1271-82.
- 45 22. Lee S, Harris KL, Whittington PM, Kolodziej PA. short stop is allelic to kakapo,  
46 and encodes rod-like cytoskeletal-associated proteins required for axon extension.  
47 *Journal of Neuroscience*. 2000;20(3):1096-108.
- 48 23. Applewhite DA, Grode KD, Keller D, Zadeh AD, Zadeh A, Slep KC, et al. The  
49 spectraplakin Short stop is an actin-microtubule cross-linker that contributes to  
50 organization of the microtubule network. *Mol Biol Cell*. 2010;21(10):1714-24.
- 51 24. Lee S, Kolodziej PA. Short Stop provides an essential link between F-actin and  
52 microtubules during axon extension. *Development*. 2002;129(5):1195-204.
- 53 25. Lee S, Kolodziej PA. The plakin Short Stop and the RhoA GTPase are required  
54 for E-cadherin-dependent apical surface remodeling during tracheal tube fusion.  
55 *Development*. 2002;129(6):1509-20.

- 1 26. Khanal I, Elbediwy A, Diaz de la Loza MdC, Fletcher GC, Thompson BJ. Shot  
2 and Patronin polarise microtubules to direct membrane traffic and biogenesis of microvilli  
3 in epithelia. *Journal of Cell Science*. 2016;129(13):2651-9.
- 4 27. Subramanian A, Prokop A, Yamamoto M, Sugimura K, Uemura T, Betschinger  
5 J, et al. Shortstop recruits EB1/APC1 and promotes microtubule assembly at the muscle-  
6 tendon junction. *Curr Biol*. 2003;13(13):1086-95.
- 7 28. Sun T, Song Y, Dai J, Mao D, Ma M, Ni J-Q, et al. Spectraplakins Shot Maintains  
8 Perinuclear Microtubule Organization in Drosophila Polyploid Cells. *Developmental Cell*.  
9 2019.
- 10 29. Mui UN, Lubczyk CM, Nam S-C. Role of spectraplakins in Drosophila  
11 photoreceptor morphogenesis. *PLoS ONE*. 2011;6(10):e25965.
- 12 30. Nashchekin D, Fernandes AR, St Johnston D. Patronin/Shot Cortical Foci  
13 Assemble the Noncentrosomal Microtubule Array that Specifies the Drosophila Anterior-  
14 Posterior Axis. *Developmental Cell*. 2016;38(1):61-72.
- 15 31. Röper K, Brown NH. Maintaining epithelial integrity: a function for gigantic  
16 spectraplakins isoforms in adherens junctions. *The Journal of Cell Biology*.  
17 2003;162(7):1305-15.
- 18 32. Gervais L, Casanova J. The Drosophila homologue of SRF acts as a boosting  
19 mechanism to sustain FGF-induced terminal branching in the tracheal system.  
20 *Development*. 2011;138(7):1269-74.
- 21 33. Bottenberg W, Sánchez-Soriano N, Alves-Silva J, Hahn I, Mende M, Prokop A.  
22 Context-specific requirements of functional domains of the Spectraplakins Short stop in  
23 vivo. *Mechanisms of Development*. 2009;126(7):489-502.
- 24 34. Voelzmann A, Liew Y-T, Qu Y, Hahn I, Melero C, Sánchez-Soriano N, et al.  
25 Drosophila Short stop as a paradigm for the role and regulation of spectraplakins.  
26 *Seminars in Cell and Developmental Biology*. 2017:1-18.
- 27 35. Alves-Silva J, Sánchez-Soriano N, Beaven R, Klein M, Parkin J, Millard TH, et al.  
28 Spectraplakins promote microtubule-mediated axonal growth by functioning as structural  
29 microtubule-associated proteins and EB1-dependent +TIPs (tip interacting proteins).  
30 *Journal of Neuroscience*. 2012;32(27):9143-58.
- 31 36. Hahn I, Ronshaugen M, Sánchez-Soriano N, Prokop A. Functional and Genetic  
32 Analysis of Spectraplakins in Drosophila. *Meth Enzymol*. 2016;569:373-405.
- 33 37. Sanchez-Soriano N, Travis M, Dajas-Bailador F, Goncalves-Pimentel C,  
34 Whitmarsh AJ, Prokop A. Mouse ACF7 and Drosophila Short stop modulate filopodia  
35 formation and microtubule organisation during neuronal growth. *Journal of Cell Science*.  
36 2009;122(14):2534-42.
- 37 38. Takács Z, Jankovics F, Vilmos P, Lénárt P, Röper K, Erdélyi M. The spectraplakins  
38 Short stop is an essential microtubule regulator involved in epithelial closure in  
39 Drosophila. *Journal of Cell Science*. 2017;130(4):712-24.
- 40 39. Olson EN, Nordheim A. Linking actin dynamics and gene transcription to drive  
41 cellular motile functions. *Nat Rev Mol Cell Biol*. 2010;11(5):353-65.
- 42 40. Blanco E, Messeguer X, Smith TF, Guigo R. Transcription factor map alignment  
43 of promoter regions. *PLoS Comput Biol*. 2006;2(5):e49.
- 44 41. Khan A, Fornes O, Arnaud Stigliani MG, Jaime A Castro-Mondragon, Robin van  
45 der Lee, Adrien Bessy, Jeanne Chêneby, Shubhada R Kulkarni, Ge Tan, Damir  
46 Baranasic, David J Arenillas, Albin Sandelin, Klaas Vandepoele, Boris Lenhard, Benoît  
47 Ballester, Wyeth W Wasserman, François Parcy, Anthony Mathelier JASPAR 2018:  
48 update of the open-access database of transcription factor binding profiles and its web  
49 framework. *Nucleic Acids Res*. 2018;46:D260-D6.
- 50 42. Voelzmann A, Okenve-Ramos P, Qu Y, Chojnowska-Monga M, Del Caño-  
51 Espinel M, Prokop A, et al. Tau and spectraplakins promote synapse formation and  
52 maintenance through Jun kinase and neuronal trafficking. *eLife*. 2016;5:2322.
- 53 43. Prout M, Damania Z, Soong J, Fristrom D, Fristrom JW. Autosomal mutations  
54 affecting adhesion between wing surfaces in Drosophila melanogaster. *Genetics*.  
55 1997;146(1):275-85.

- 1 44. Lee M, Nahm M, Kwon M, Kim E, Zadeh AD, Cao H, et al. The F-actin-  
2 microtubule crosslinker Shot is a platform for Krasavietz-mediated translational  
3 regulation of midline axon repulsion. *Development*. 2007;134(9):1767-77.
- 4 45. Sutherland D, Samakovlis C, Krasnow MA. branchless encodes a Drosophila  
5 FGF homolog that controls tracheal cell migration and the pattern of branching. *Cell*.  
6 1996;87(6):1091-101.
- 7 46. Riederer BM. Microtubule-associated protein 1B, a growth-associated and  
8 phosphorylated scaffold protein. *Brain Research Bulletin*. 2007;71(6):541-58.
- 9 47. Morris M, Maeda S, Vossel K, Mucke L. The many faces of tau. *Neuron*.  
10 2011;70(3):410-26.
- 11 48. Elie A, Prezel E, Guérin C, Denarier E, Ramirez-Rios S, Serre L, et al. Tau co-  
12 organizes dynamic microtubule and actin networks. *Scientific Reports*. 2015;5:9964.
- 13 49. Cabrales Fontela Y, Kadavath H, Biernat J, Riedel D, Mandelkow E, Zweckstetter  
14 M. Multivalent cross-linking of actin filaments and microtubules through the microtubule-  
15 associated protein Tau. *Nature Communications*. 2017;8(1):1981-12.
- 16 50. Biswas S, Kalil K. The Microtubule-Associated Protein Tau Mediates the  
17 Organization of Microtubules and Their Dynamic Exploration of Actin-Rich Lamellipodia  
18 and Filopodia of Cortical Growth Cones. *Journal of Neuroscience*. 2018;38(2):291-307.
- 19 51. Lee T, Hacohen N, Krasnow M, Montell DJ. Regulated Breathless receptor  
20 tyrosine kinase activity required to pattern cell migration and branching in the Drosophila  
21 tracheal system. *Genes Dev*. 1996;10(22):2912-21.
- 22 52. Levi BP, Ghabrial AS, Krasnow MA. Drosophila talin and integrin genes are  
23 required for maintenance of tracheal terminal branches and luminal organization.  
24 *Development*. 2006;133(12):2383-93.
- 25 53. Zhang J, Yue J, Wu X. Spectraplakins family proteins - cytoskeletal crosslinkers  
26 with versatile roles. *Journal of Cell Science*. 2017;130(15):2447-57.
- 27 54. Schindelin J A-CI, Frise E, Kaynig V, Longair M, Pietzsch T, Preibisch S, Rueden  
28 C, Saalfeld S, Schmid B, Tinevez JY, White DJ, Hartenstein V, Eliceiri K, Tomancak P,  
29 Cardona A. Fiji: an open-source platform for biological-image analysis. *Nat Methods*.  
30 2012;9(7):676-82.
- 31
- 32
- 33
- 34
- 35
- 36
- 37
- 38
- 39
- 40
- 41
- 42
- 43

1 FIGURES

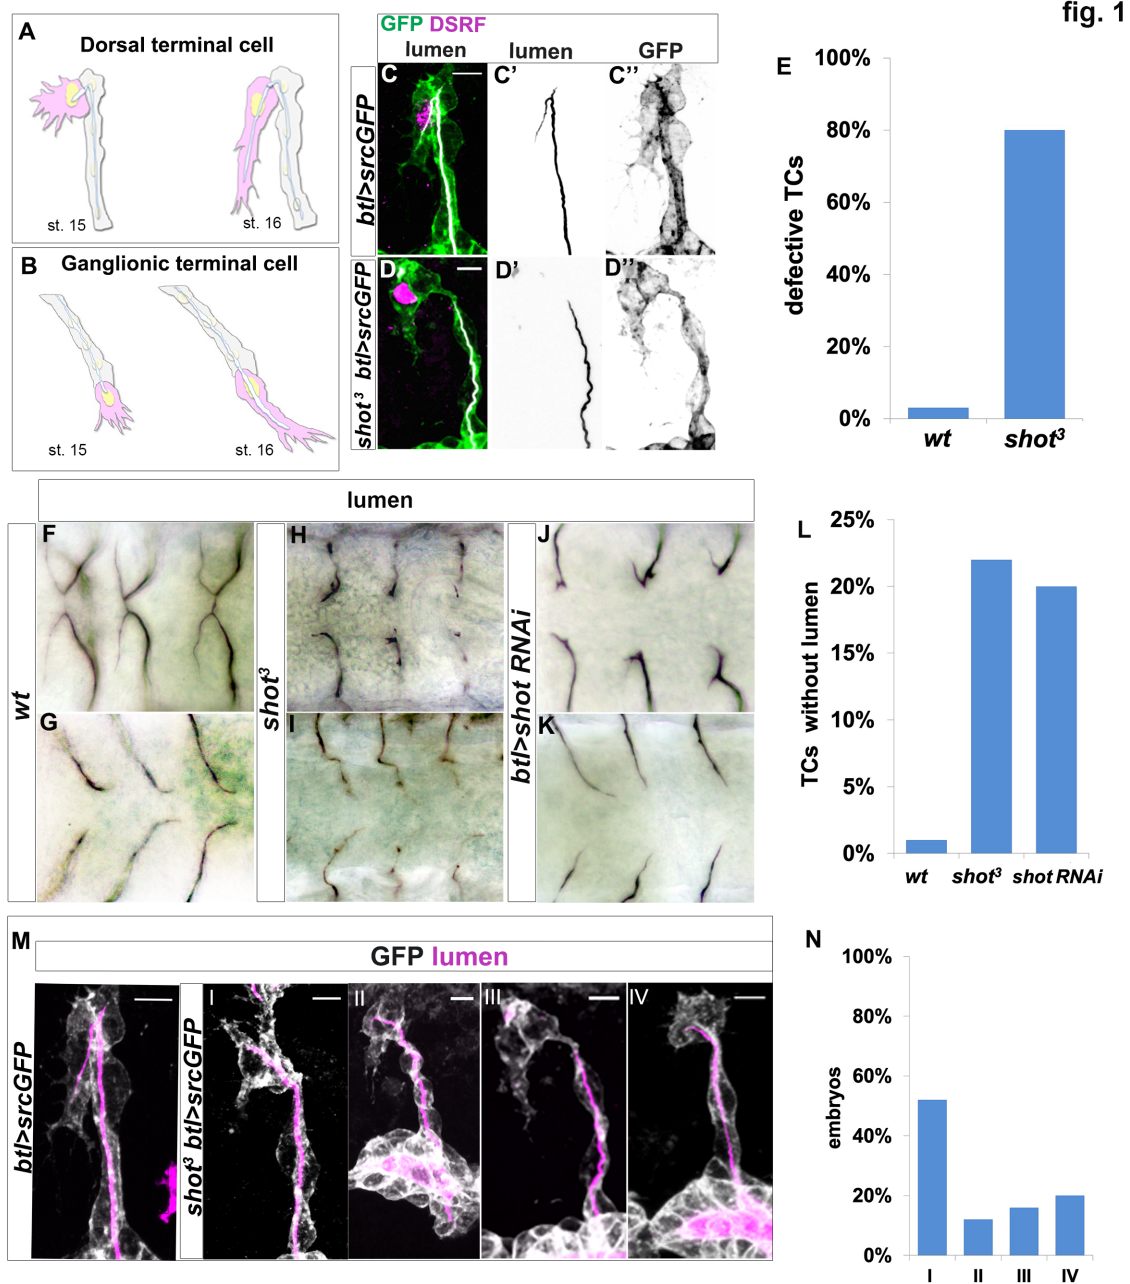

2

3 **Figure 1. *shot* loss of function induces defects in subcellular lumen formation.**

4 (A-B) Representation of dorsal and ganglionic TCs from st. 15 to st. 16 (DB and GB in  
5 grey, TC in pink). At st.15, the TC (cytoplasm in pink, nucleus in yellow, basal membrane  
6 in grey, apical membrane in blue and lumen in white) emits filopodia in the direction of  
7 cell migration and elongates; apical membrane grows in the same direction giving rise  
8 to the outline of the subcellular lumen. As it extends, the subcellular lumen is filled of

1 chitin (white). At the end of st.16 the TC has elongated and the subcellular lumen is  
2 formed inside the cytoplasm, creating a new apical surface in the TC.  
3 (C-D) DBs at st.15 of *btl>srcGFP* (control, C) and *shot<sup>3</sup>; btl>srcGFP* (D) fixed embryos  
4 stained with GFP to visualize tracheal cells, green in C and D, grey in C' and D'', CBP  
5 to visualize the lumen, white in C and D, black in C' and D' and DSRF in magenta.  
6 Anterior side is on the left and dorsal is up, scale bars 5  $\mu$ m.  
7 (E) Quantification of defective TCs in *shot<sup>3</sup>* and *wt* (n= 20 embryos, 400TCs).  
8 (F-K) DBs (F, H, J dorsal view) and GBs (G, I, K ventral view) of fixed embryos stained  
9 with anti-Gasp antibody at st.16 of *wt* (F and G), *shot<sup>3</sup>* (H and I) and *btl>shotRNAi* (J and  
10 K)  
11 (L) Quantification of TCs (genotype indicated) without subcellular lumen (*wt* n=400, *shot<sup>3</sup>*  
12 =400, *btl>shotRNAi* n=300).  
13 (M-N) Different types of TC mutant phenotypes were produced in *shot* LOF conditions.  
14 (M) Dorsal branches of *btl>srcGFP* control (*wt*) and *shot<sup>3</sup>* embryos stained with GFP  
15 (grey) to visualize membrane and CBP (in magenta) to visualize the lumen. Anterior side  
16 is on the left and dorsal side is up. Scale bars 5  $\mu$ m. (I) TC partially elongated with formed  
17 lumen but with wrong directionality (52%); (II) the elongation was stopped prematurely  
18 and a primordium of subcellular lumen was formed (12%); (III) the cell elongated partially  
19 but the lumen was completely absent (16%); and (IV) the cell was not able to elongate  
20 and the lumen was completely absent (20%). (N) Quantification of the different types of  
21 TC mutant phenotypes reported as I-IV (n=25 TCs).  
22

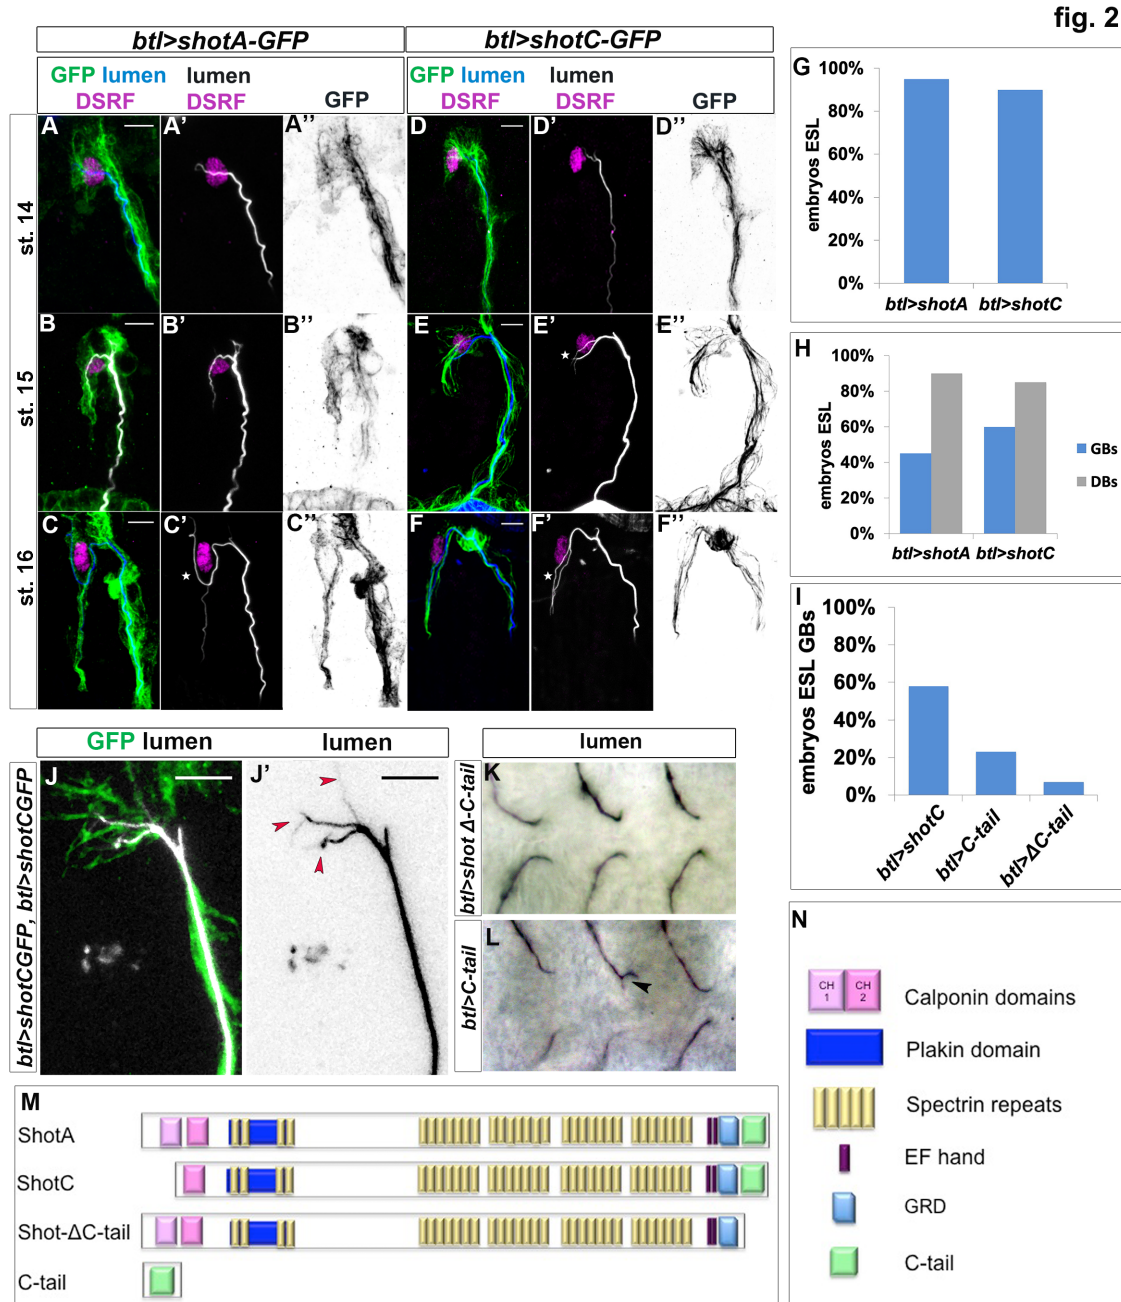

1

2

3 **Figure 2. *ShotOE* induces luminal branching through its microtubule binding**  
 4 **domain.**

5 Lateral view of DB tip cells from st.14 to st.16, of *btl>shotA-GFP* embryos (A-C) and  
 6 *btl>shotCGFP* (D- F). Embryos were stained with GFP (green in A-F and grey A''-F'') to  
 7 visualize Shot-GFP, DSRF to mark the TC nuclei (in magenta) and CBP to stain the  
 8 chitinous lumen (blue in A-F and white A'-F'). Both overexpressing conditions induced

1 ESLs (white stars). Note that GFP was more distributed throughout the TC cytoplasm of  
2 embryos overexpressing *shotA*, and more organized in bundles in TCs overexpressing  
3 *shotC*. Anterior side of embryo is on the left and dorsal side up. Scale bars 5µm.  
4 (G) Penetrance of ESL phenotype of embryos overexpressing *shotA* (n=20 embryos,  
5 400 TCs) and *shotC* (n=20 embryos, 400 TCs) in all trachea cells, displaying at least one  
6 TC affected, considering both GBs and DBs.  
7 (H) Distribution of ESL phenotype in GBs (n=200 TCs) blue column and DBs (n = 200  
8 TCs) grey column.  
9 (J) ESL phenotype induced by Shot is dosage dependent. Example of dorsal TC of an  
10 embryo overexpressing two copies of *btl>shotC-GFP*, stained with anti-GFP and CBP.  
11 Red arrows indicate extra subcellular lumen branching. Note that the ESL are very thin  
12 and follow Shot positive bundles detected with GFP. Anterior side is on the left, dorsal  
13 midline is on the top. Scale bars 5µm.  
14 (I, K, L) The C-tail domain is involved in ESL formation. (I) Percentage of embryos  
15 overexpressing *shotC*, *shotΔCtail* and *C-tail* in the tracheal system displaying GB ESLs  
16 (n= 40 embryos, 400TCs each genotype). Tips of GB TCs from *btl>shotΔCtail* embryos  
17 with a single subcellular lumen each (K) and *btl>C-tail* (L) in which one TC is bifurcated;  
18 stained with anti-Gasp (ventral view, anterior side of the embryo is on the left).  
19 (M) Schematic representation of different Shot constructs used and (N) Spectraplaklin  
20 protein domains.  
21

fig. 3

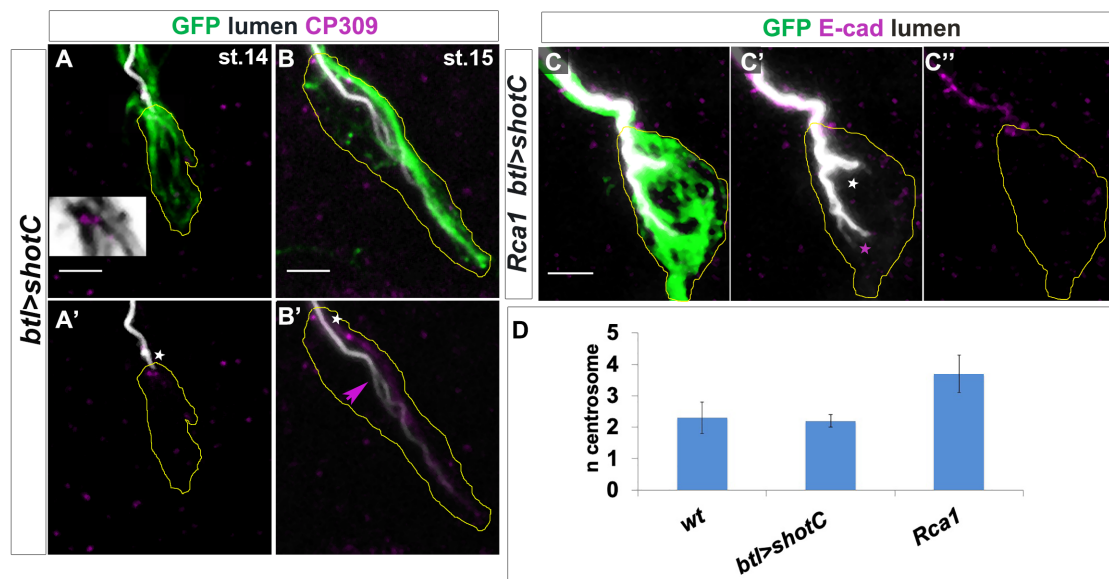

1  
2 **Figure 3. ESL induction by *ShotOE* is not associated with centrosome**  
3 **amplification.**

4 (A, B) GB TC of st. 14 (A) and st. 15 (B) *btI>shotC-GFP* embryos stained with CBP to  
5 mark lumen (white), GFP to visualize Shot (green) and CP309 to mark centrosomes  
6 (magenta); the outline of TCs is drawn in yellow. The box in A is a digital magnification  
7 showing the TC centrosome pair (magenta) and GFP positive Shot bundles (in grey)  
8 emanating from centrosomes. White stars indicate apically localized centrosomes. In B'  
9 the subcellular lumen (magenta arrow) is bifurcated far from the centrosome-pair, from  
10 the pre-existing lumen.

11 (C) GB tips from *Rca1; btI>shotC-GFP* embryos at st. 15, stained with CBP (in white) to  
12 visualize the lumen and E-cadherin (in magenta) to recognize the apical junction.  
13 Anterior side of the embryo is on the left and ventral is down. Scale bar 2  $\mu$ m. In these  
14 cases, two types of luminal bifurcations are detected: one from the apical junction (white  
15 asterisk), caused by *Rca1* supernumerary centrosomes and another arising from the pre-  
16 existing lumen (magenta asterisk), caused by ShotOE.

17 (D) Quantification of centrosome number in *wt*, *btI>shotC* and *Rca1* embryos  $\pm$  SEM.

18



fig. 4

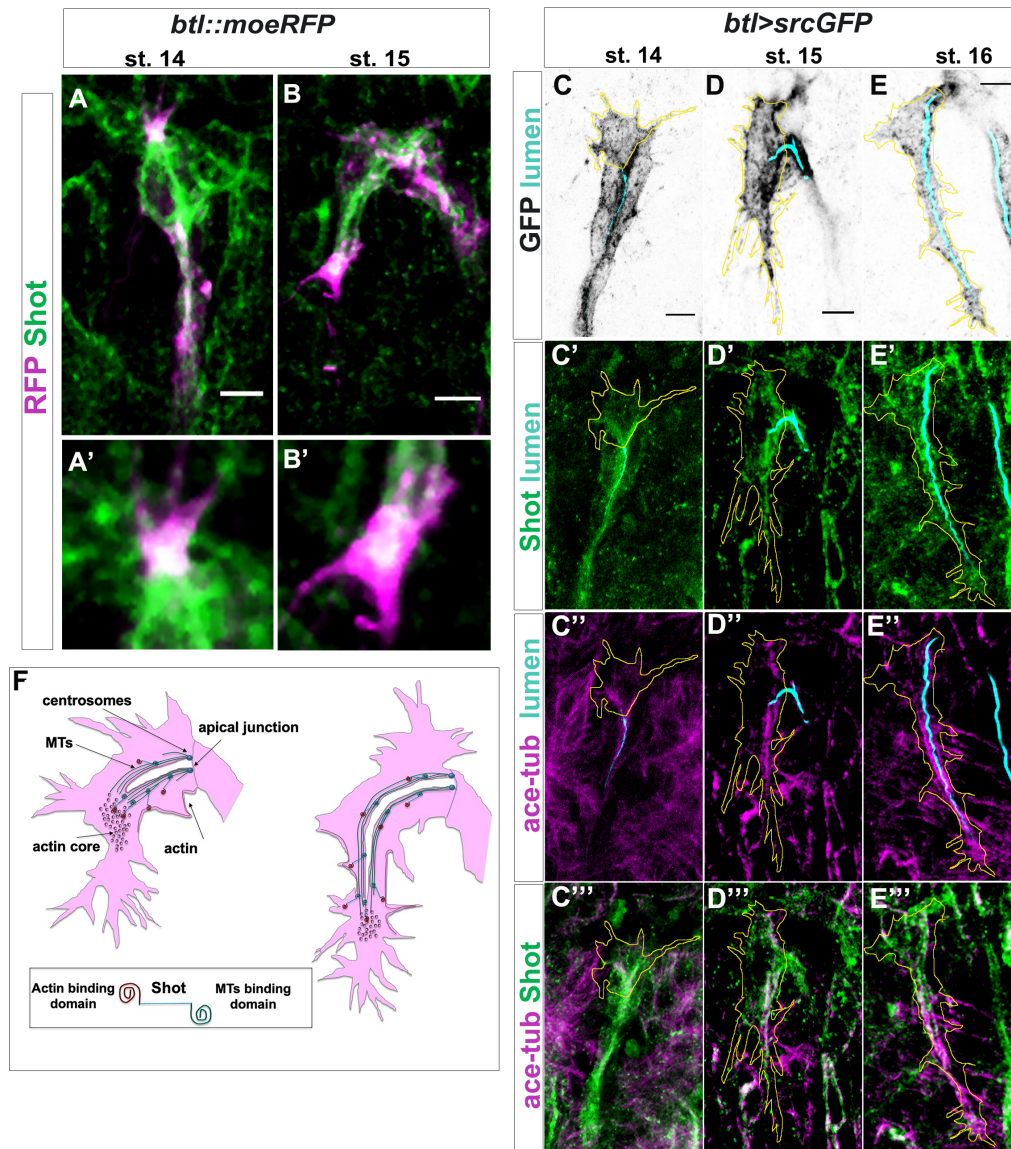

1

2 **Figure 4. Shot colocalizes with TC cytoskeletal components.**

3 (A-B) Endogenous Shot colocalized to the Actin/Moe area during TC development. Tip  
4 of dorsal branches from st. 14 to late st. 15 of *btl::moeRFP* embryos stained with RFP  
5 (magenta) and Shot (green). In the magnification of the tip of the TCs (A'-B') note Shot  
6 and RFP co-localization.

7 (C-E) Endogenous Shot accumulated around stable microtubules during subcellular  
8 lumen formation. Dorsal TCs from fixed embryos *btl>srcGFP* stained with Shot and  
9 acetylated-tubulin antibodies and fluostain, from st.14 to st. 16.

10 In all panels the TC outline is drawn in yellow. GFP staining is showed in grey and cell

1 contour in yellow (C-E), endogenous Shot is in green (C'- E' and C'''- E'''), acetylated  
2 tubulin is in magenta (C''- E''') and the lumen was detected with fluostain, represented  
3 in cyan in (C'- E' and C''-E'''). Acetylated tubulin and Shot are both accumulated toward  
4 ahead of the subcellular lumen at earliest stages (st. 14-15) and around the subcellular  
5 lumen at later stages (st. 16). Note that co-localization between acetylated tubulin and  
6 Shot is mainly detectable inside the TCs. Anterior side is on the left, dorsal midline is up.  
7 Scale bar 5µm.

8 (F) Schematic representation of dorsal TC development from st.15 to st.16. Basal  
9 membrane in grey, apical membrane in light blue, subcellular lumen in white, the actin  
10 network in red and MTs are in green. Between st.14 and st.15 actin dots mature in an  
11 actin core in front of the tip of the subcellular lumen in formation that is surrounded by  
12 microtubules. Shot (represented on the bottom of the figure) is detectable both inside the  
13 actin core and surrounding the lumen where stable MTs are organized.

14

fig. 5

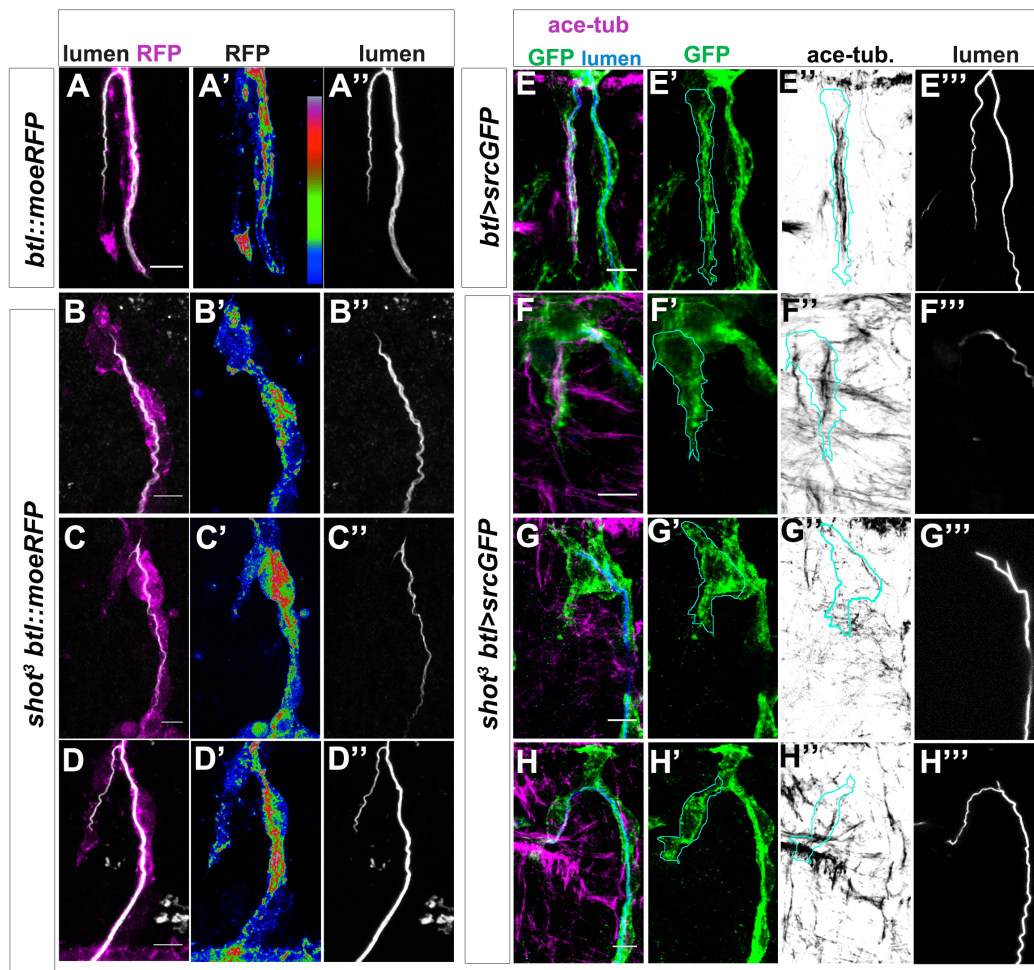

1

2 **Figure 5. Shot LOF leads to disorganized MT-bundles and actin localization**  
 3 **defects.**

4 (A-D) Asymmetric actin accumulation is affected in *shot*<sup>3</sup> mutant embryos. Dorsal TC  
 5 from *shot*<sup>3/+</sup>; *btl::moeRFP* heterozygous controls (A) and *shot*<sup>3</sup>; *btl::moeRFP* mutant  
 6 embryos (B-D), stained with RFP (Magenta in A-D or in a colour scale in which blue is  
 7 low, green is middle and red high intensity in A'- D') and CBP (in white). In *shot* mutant  
 8 Moe/Actin was affected in its accumulation in the TC (B-D). (A) wt control; (B) when the  
 9 cell was not elongated and the lumen is not formed; (C) when the cell was partially  
 10 elongated but the lumen was not; (D) when the cell elongated and a lumen was detected  
 11 (D). Note that Moe/Actin was affected even when the cell was elongated and a partially  
 12 lumen was formed.

1 (E-H) TC MT-bundles in *shot*<sup>3</sup>. Dorsal TC from a st. 16 control embryo (A) and *shot*<sup>3</sup>  
 2 mutant (B-D) stained with GFP (green) acetylated tubulin (in magenta in E-H and in grey  
 3 in E''-H'') and CBP (in blue in E-H and grey in E'''-H'''). The TC border is drawn in cyan  
 4 (E-H'''). In all cases the organization and the overall amount of stable MTs detected was  
 5 strongly affected; in (F) MT-bundles were observed to be disorganized along the  
 6 cytoplasm devoid of a subcellular lumen and in G and H only a thin MT-bundle  
 7 surrounded the subcellular lumen. Anterior side is on the left and dorsal midline is up.  
 8 Scale bars 5  $\mu$ m.

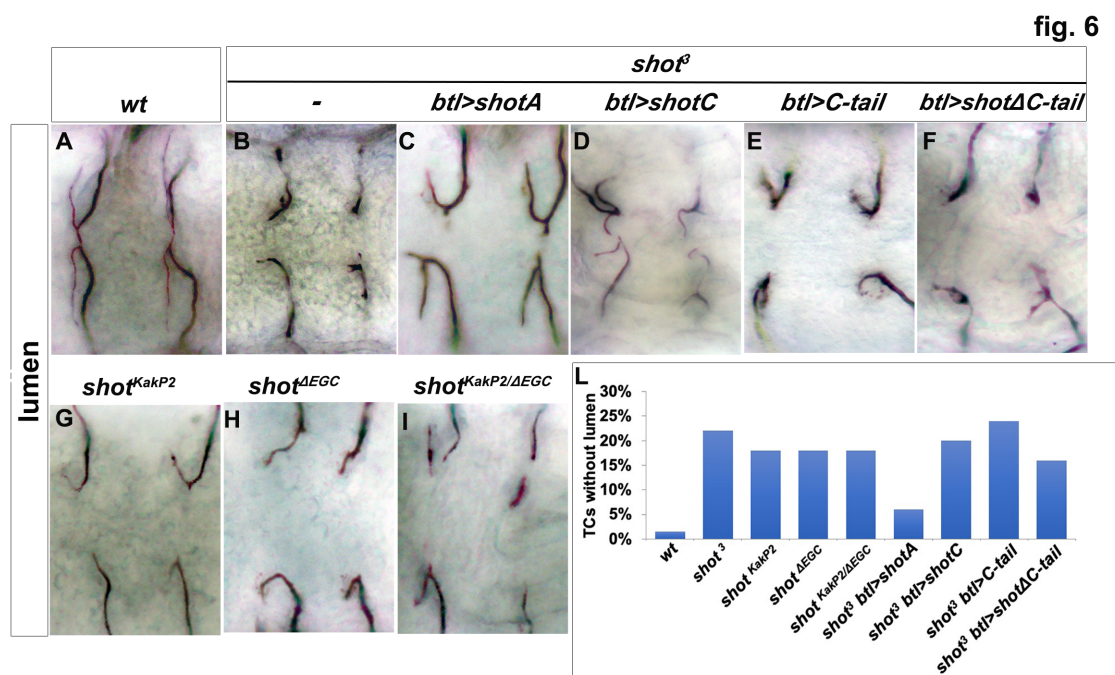

9  
 10 **Figure 6. Shot Actin- and MT-binding domains are necessary for proper**  
 11 **subcellular lumen formation.**

12 (A-I) Dorsal branches of st.16 embryos, stained with anti-Gasp to visualize the lumen.  
 13 Genotype is indicated above each panel. (B-F) Null allele, *shot*<sup>3</sup>, rescue experiments  
 14 indicate that both the actin-binding domain and the MT-binding domain are involved in  
 15 subcellular lumen formation since the only construct able to rescue the null allele  
 16 phenotype was full length UASShotA (B and J).  
 17 (G-I) Both functional domains are needed in the same molecule since mutants affected  
 18 only in the actin-binding domain (*shot*<sup>KakP2</sup>) or in the MT-binding domain (*shot* <sup>$\Delta$ EGD</sup>) and

- 1 the transheterozygous *shot<sup>KakP2/ΔEGD</sup>* display the same subcellular lumen phenotype as
- 2 the null mutant *shot<sup>3</sup>*.
- 3 (J) Quantification of TCs without lumen: *wt*, *shot<sup>3</sup>*, *shot<sup>KakP2</sup>*, *shot<sup>ΔEGD</sup>*, *shot<sup>KakP2/ΔEGD</sup>*
- 4 (n=400 TCs), *shot<sup>3</sup>*, *btl>shotA* (n=200 TCs), *shot<sup>3</sup>*; *btl>shotC*, *shot<sup>3</sup>*; *btl>shotCtail*
- 5 (n=240), *shot<sup>3</sup>*; *btl>shotΔCtail* (n=220).
- 6

fig. 7

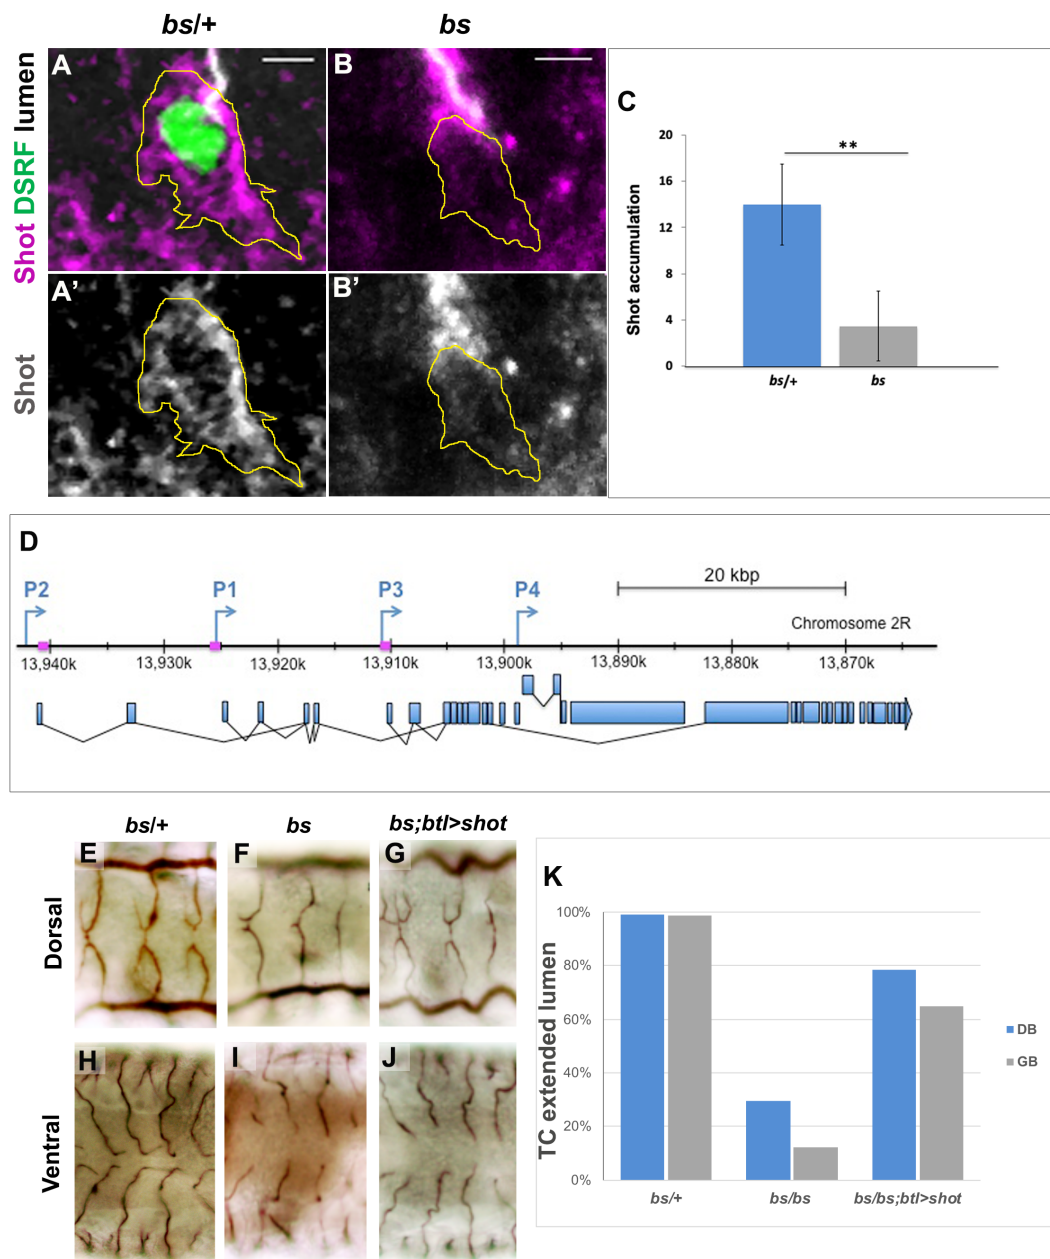

7

8

1 **Figure 7. Shot expression is regulated by DSRF in TCs.**  
2 GB TC at st. 15 from *bs* heterozygous controls (A) and homozygous mutant embryos(B),  
3 stained with Shot (magenta in A and B, grey in A' and B'), DSRF (green) antibodies and  
4 CBP (grey). In yellow, the outline of the TCs. Shot is less accumulated in TCs from  
5 homozygous (B, B' and C) n=9 TCs (raw integrated density was measured +/- SEM).  
6 (D) P1, P2 and P3 transcription start sites of the *shot* locus together with the specific  
7 sequences recognized by the DSRF transcription factor (squares in magenta) (adapted  
8 from (36)).  
9 Dorsal and ventral TCs from *wt* (E and H) *bs* (F and I) mutant embryos. The tracheal  
10 overexpression of *Shot* is sufficient to restore the growth of TC subcellular lumina in *bs*  
11 mutant background (G, J). (K) Quantification of TCs with an extended lumen: *bs/+* n=350;  
12 *bs/bs* n=280 and *bs/bs;btl>ShotC* n=210.  
13

fig. 8

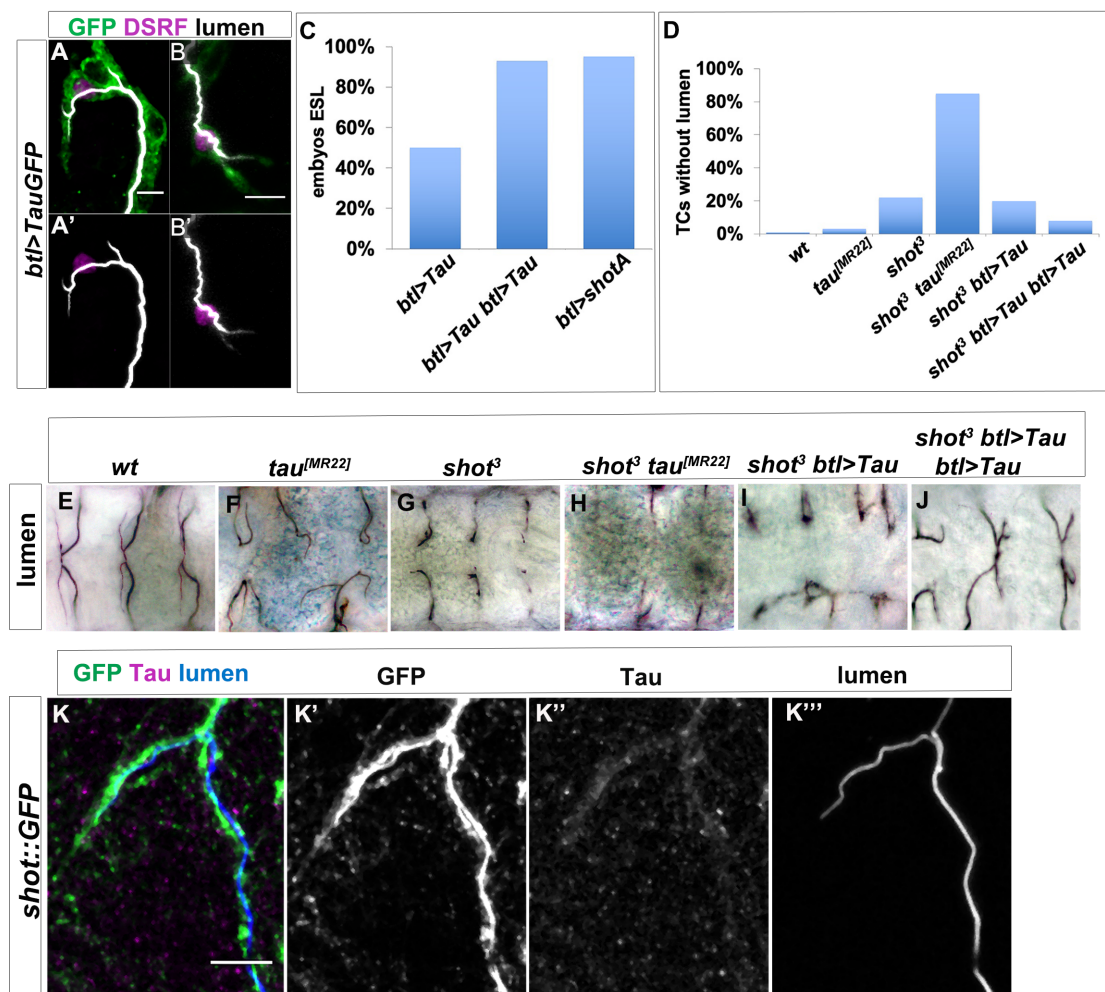

1

2 **Figure 8. Shot and Tau functionally overlap during subcellular lumen formation.**

3 (A-B) DB (A) and GB (B) embryonic TCs expressing *TauGFP* in the tracheal system,  
 4 stained with GFP (green), CBP (white) and DSRF (magenta), showing the ESL  
 5 phenotype. In A' in B' lumen and TC nuclei are shown, anterior side on the left, dorsal  
 6 side is up; scale bar 5  $\mu$ m.

7 (C) Quantification of embryos overexpressing one (n=23) or two (n=16) copies of *btl >*  
 8 *TauGFP* displaying at least one bifurcated terminal cell in comparison with the ShotOE  
 9 quantification (n= 20).

10 (D) Quantification of TCs without subcellular lumen and (E-J) dorsal view of TCs from st.  
 11 16 embryos (genotype indicated) stained with anti-Gasp.

1 *tau* deletion mutant does not display a subcellular lumen phenotype (D and F, nTCs =79)  
 2 but enhances the effect of *shot* mutation in the double mutant *shot*<sup>3</sup>; *tau*<sup>MR22</sup> (D and H,  
 3 TCs=180). One copy of Tau is not sufficient to rescue *shot*<sup>3</sup> (D and I, n=400) but two  
 4 copies rescues the *shot* LOF TC phenotype (D and J n=260).  
 5 (K) Tau is detected in embryonic TCs. Embryonic *shot::GFP* dorsal TC stained with GFP  
 6 (green in K, grey in L), anti-Tau antibody (magenta in K, grey in M) and CBP (blue in K  
 7 grey in N); scale bar 5  $\mu$ m.  
 8

Fig.9

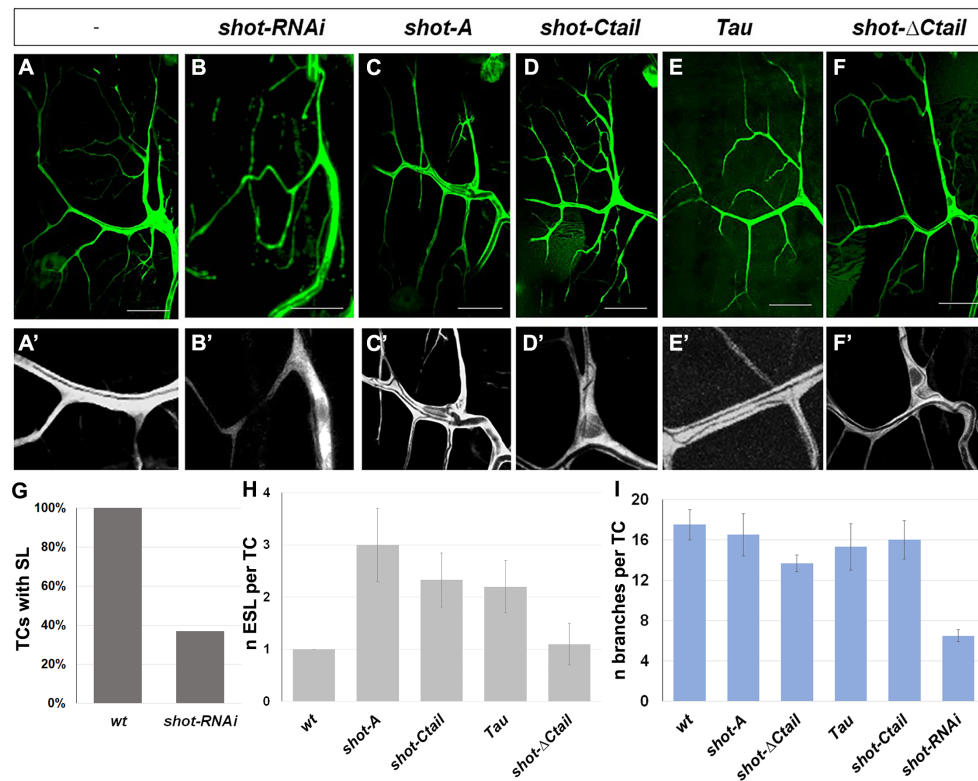

9  
 10 **Figure 9. Shot and Tau modulate luminal branching in larval TCs.**  
 11 Wandering larval (L3) TCs expressing only GFP (A) and different Shot and Tau  
 12 constructs (B-F) under the control of a tracheal DSRFGAL4 driver (all except E where  
 13 the driver used was btIGAL4). (A, A') UASEB1GFP (n=10) (B, B') UASshotRNAi and



1 UASEB1GFP (n=10); (C, C') UASShotA-GFP (n=10); (D, D') UASshotCtail-GFP (n=8);  
2 (E, E') UAStauGFP (n=8); (F,F') UASshot $\Delta$ Ctail-GFP (n=8). (G) Quantification of the  
3 percentage of TCs with detectable subcellular lumen; (H) quantification of the number of  
4 ESL per TC branch found; (I) quantification of the number of branches per TC. Scale  
5 bars 50  $\mu$ m.

6

7

fig. 10

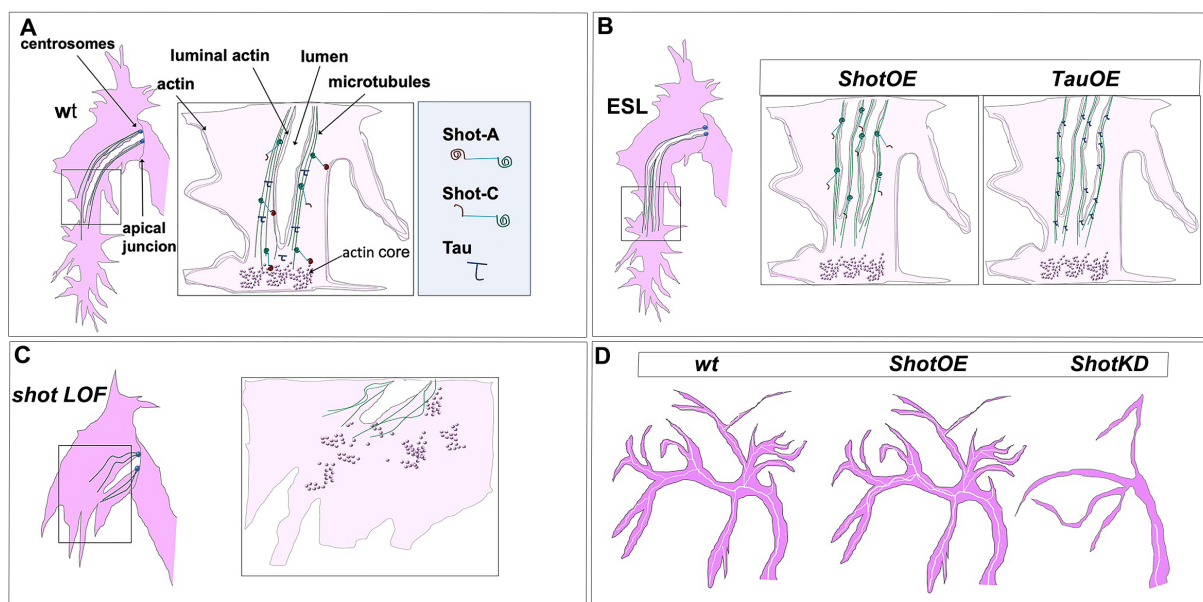

8

9 **Figure 10. Shot and Tau dynamically modulate the cytoskeleton during**  
10 **subcellular lumen formation.**

11 Schematic representation of st.16 embryonic (A, B, C) and third instar larval (D) TCs;  
12 cytoplasm is in pink and luminal space in white.

13 (A) Cytoskeletal components in a wt embryo with the actin-network (dark pink) and MTs  
14 (green). Shot and Tau are able to organize the cytoskeleton by crosslinking MTs and  
15 actin; Shot (represented with the actin domain in red and the MT binding domain in  
16 green) mediates the crosstalk between actin and MTs as the longer isoform (ShotA), but  
17 shorter isoforms lacking the ABD (ShotC) do not bind actin. Tau is represented in blue.

- 1 (B) ESLs are formed by from the pre-existing lumen, which acts as an MTOC, by
- 2 overexpressing *shot* (ShotOE) or *Tau* (TauOE) through MT-stabilization.
- 3 (C) In the absence of Shot proper cytoskeletal organization is not established and cell
- 4 elongation and lumen formation do not occur. This phenotype can only be rescued by
- 5 expressing full-length Shot in TCs.
- 6 (D) Schematic representation of larval TCs in *wt*, in *ShotOE* (or *TauOE*) where ESLs are
- 7 formed without concomitant single-cell branching and in *ShotKD*, where both cellular and
- 8 luminal branching are reduced.
- 9
